# Supplementary material for: Confirmation of Statin and Fibrate Use from Small-Volume Archived Plasma Samples by High-Throughput LC-MS/MS Method
Source: MDPI journal article supplement (doi:10.3390/ijms24097931), 2023-04-27
Supplement: s1 [file s1]

### Supplementary material

Title: Confirmation of statin and fibrate use from small-volume archived plasma samples by high-throughput LC-MS/MS method.

Journal name: International Journal of Molecular Sciences

Authors: Jennifer D. Kusovschi<sup>1</sup>, Anna A. Ivanova<sup>1</sup>, Michael S. Gardner<sup>1</sup>, Robert W. McGarrah III<sup>2</sup>, William E. Kraus<sup>2</sup>, Zsuzsanna Kuklenyik<sup>1\*</sup>, James L. Pirkle<sup>1</sup>, John R Barr<sup>1\*</sup>

<sup>1</sup>Division of Laboratory Sciences, National Center for Environmental Health, Centers for Disease Control and Prevention, Atlanta, GA 30341

<sup>2</sup>Duke Molecular Physiology Institute, Duke University School of Medicine, Durham, NC, USA

\*Corresponding Authors:

John R. Barr, Ph. D, Clinical Chemistry Branch, Division of Laboratory Sciences, National Center for Environmental Health, Centers for Disease Control and Prevention, Atlanta, GA 30341; E-Mail: jbb0@cdc.gov; Phone: +1-770-488-7848; Fax: +1-770-488-0509.

Zsuzsanna Kuklenyik, Clinical Chemistry Branch, Division of Laboratory Sciences, National Center for Environmental Health, Centers for Disease Control and Prevention, Atlanta, GA 30341; E-Mail: czk9@cdc.gov; Phone: +1-770-488-7923.

| Target                         | Precursor Nominal Mass (Da) and Structure                                                  | Product Nominal Mass (Da) and Proposed Structure                                             |
|--------------------------------|--------------------------------------------------------------------------------------------|----------------------------------------------------------------------------------------------|
| 2-OH-Atorvastatin <sup>1</sup> | 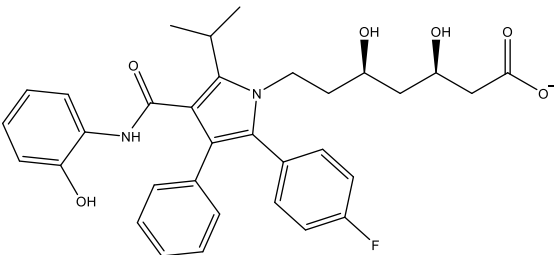<br>573   | <br>278   |
| 4-OH-Atorvastatin <sup>1</sup> | <br>573   | <br>413   |
| Atorvastatin <sup>2</sup>      | <br>557  | <br>278  |
| Clofibric Acid <sup>3</sup>    | <br>213 | <br>127 |
| Fenofibric Acid <sup>3</sup>   | <br>317 | <br>231 |

|                           |                                                                                             |                                                                                              |
|---------------------------|---------------------------------------------------------------------------------------------|----------------------------------------------------------------------------------------------|
| Fluvastatin <sup>3</sup>  | 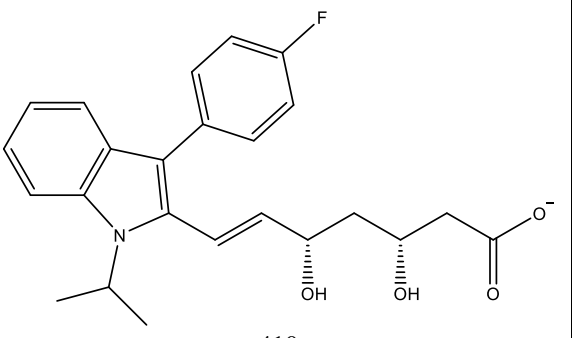<br>410   | <br>348   |
| Gemfibrozil <sup>3</sup>  | <br>249   | <br>121   |
| Lovastatin Acid           | <br>421  | <br>101  |
| Pitavastatin <sup>3</sup> | <br>420 | <br>358 |

|                                         |                                                                                            |                                                                                              |
|-----------------------------------------|--------------------------------------------------------------------------------------------|----------------------------------------------------------------------------------------------|
| Pravastatin, Scheme 1 <sup>4</sup>      | 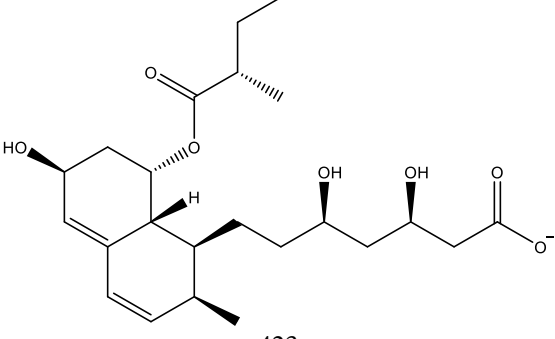<br>423   | <br>321   |
| Pravastatin, Scheme 2 <sup>4</sup>      | <br>423   | <br>321   |
| Rosuvastatin <sup>3</sup>               | <br>480  | <br>418  |
| Simvastatin Acid, Scheme 1 <sup>4</sup> | <br>435 | <br>319 |

|                                         |                                                                                              |                                                                                                |
|-----------------------------------------|----------------------------------------------------------------------------------------------|------------------------------------------------------------------------------------------------|
| Simvastatin Acid, Scheme 2 <sup>4</sup> | 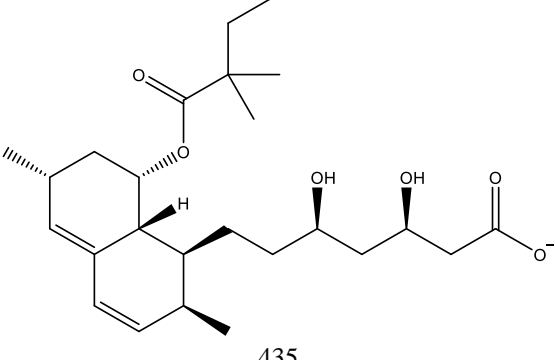 <p>435</p> |  <p>319</p> |
| N-desmethyl-Rosuvastatin                |  <p>466</p> |  <p>404</p> |

**Figure S1. Target precursor and fragment products as analyzed by SMRM.**

<sup>1</sup>Inferred from atorvastatin fragmentation.

<sup>2</sup>Kant Shandilya, D. , Israni, R. and Edward Joseph, P. (2018) Prediction of the Fragmentation Pathway of Atorvastatin De-Protonated Ion. *Open Access Library Journal*, 5, 1-14. doi: 10.4236/oalib.1104547.

<sup>3</sup>Proposed by us, and confirmed by labeled IS. Not definitive.

<sup>4</sup>Qin, X.-Z. (2003), Collision-induced dissociation of the negative ions of simvastatin hydroxy acid and related species. *J. Mass Spectrom.*, 38: 677-686. <https://doi.org/10.1002/jms.482>

a)

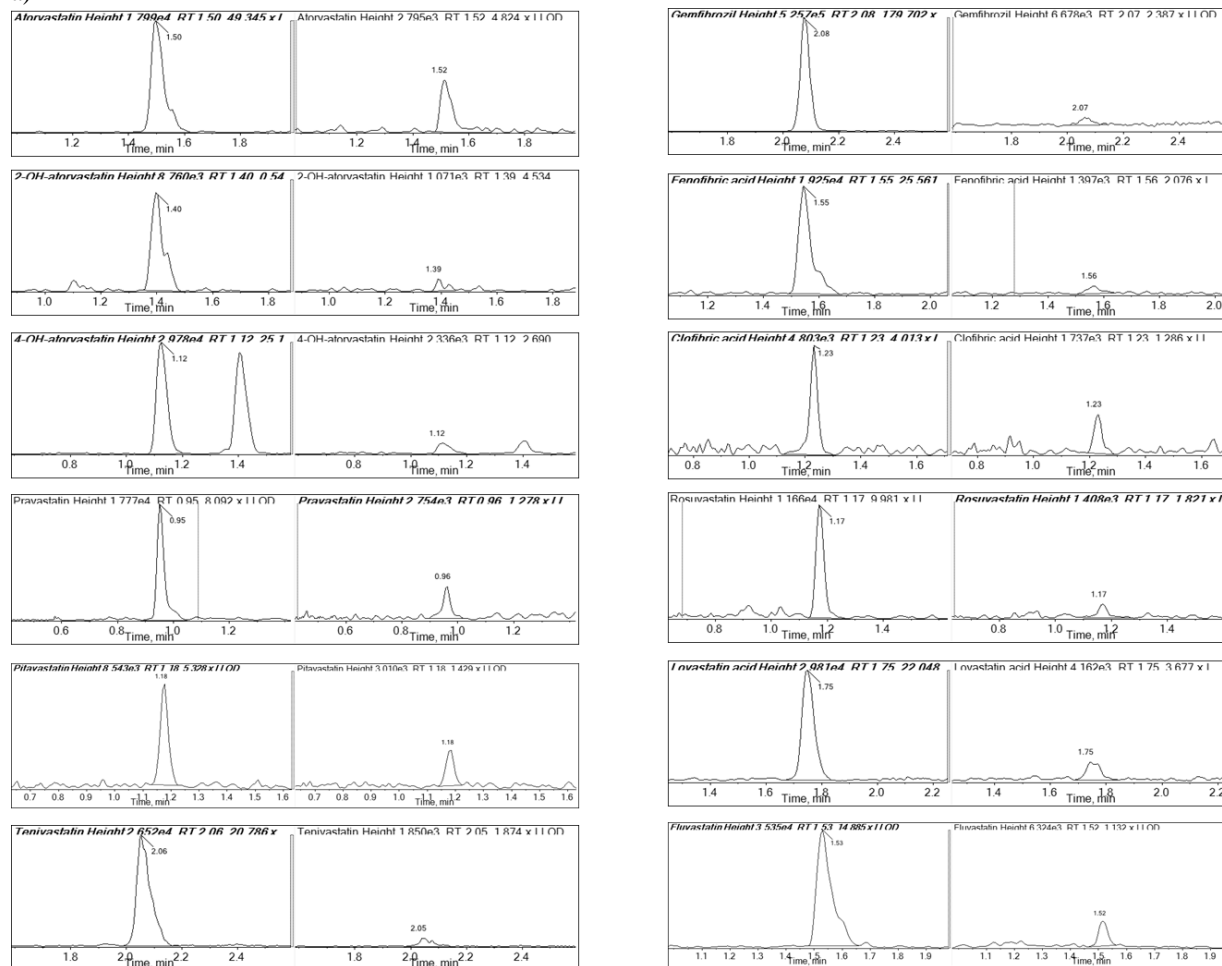

b)

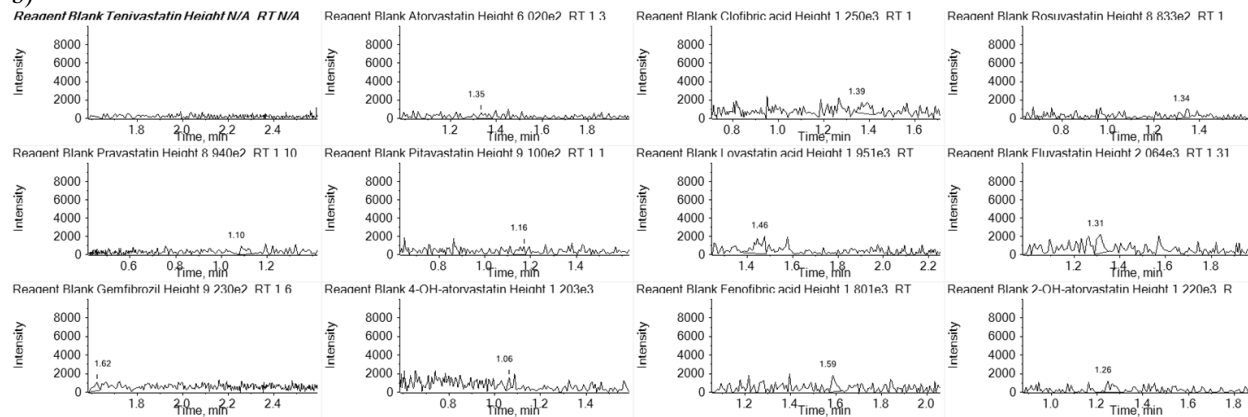

**Figure S2. Representative Chromatograms.** Individual analyte chromatograms a) at near the median concentrations in plasma samples and near the 5 x LLOD level concentrations and b) blanks.

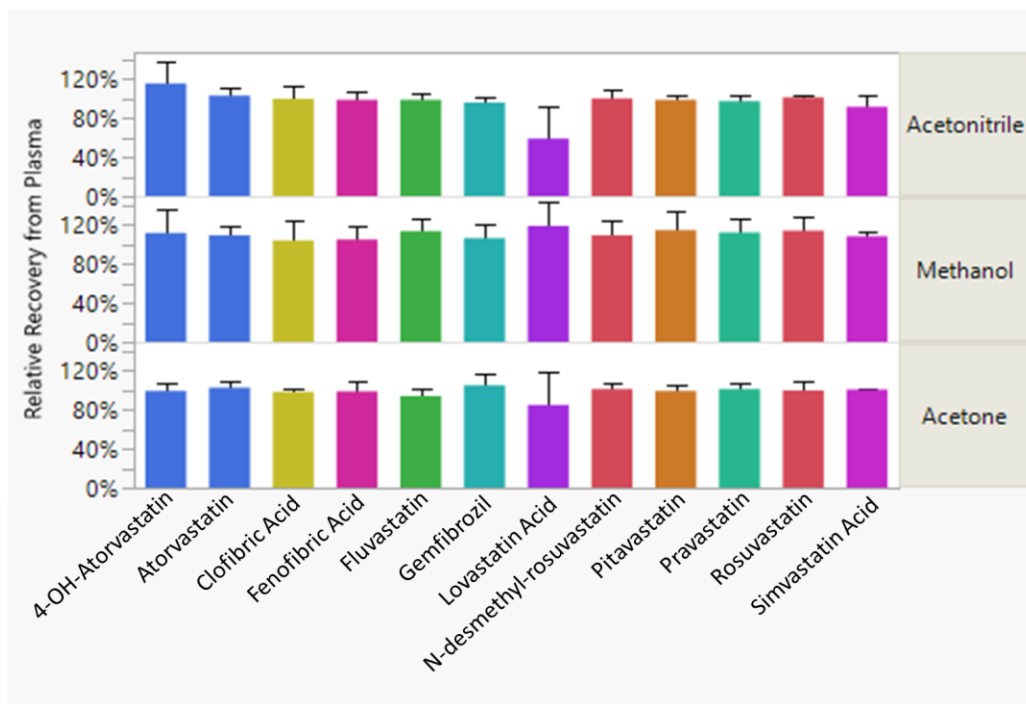

**Figure S3. Comparison of Precipitation Solvents for Analyte Recovery.** Comparison of protein precipitation solvents by analyte recovery from spiked plasma relative to spiked water. Error bars represent standard deviation of repeats (n = 5). Acetone provided sufficient recovery with greater confidence in measurements and consistency in recovery.

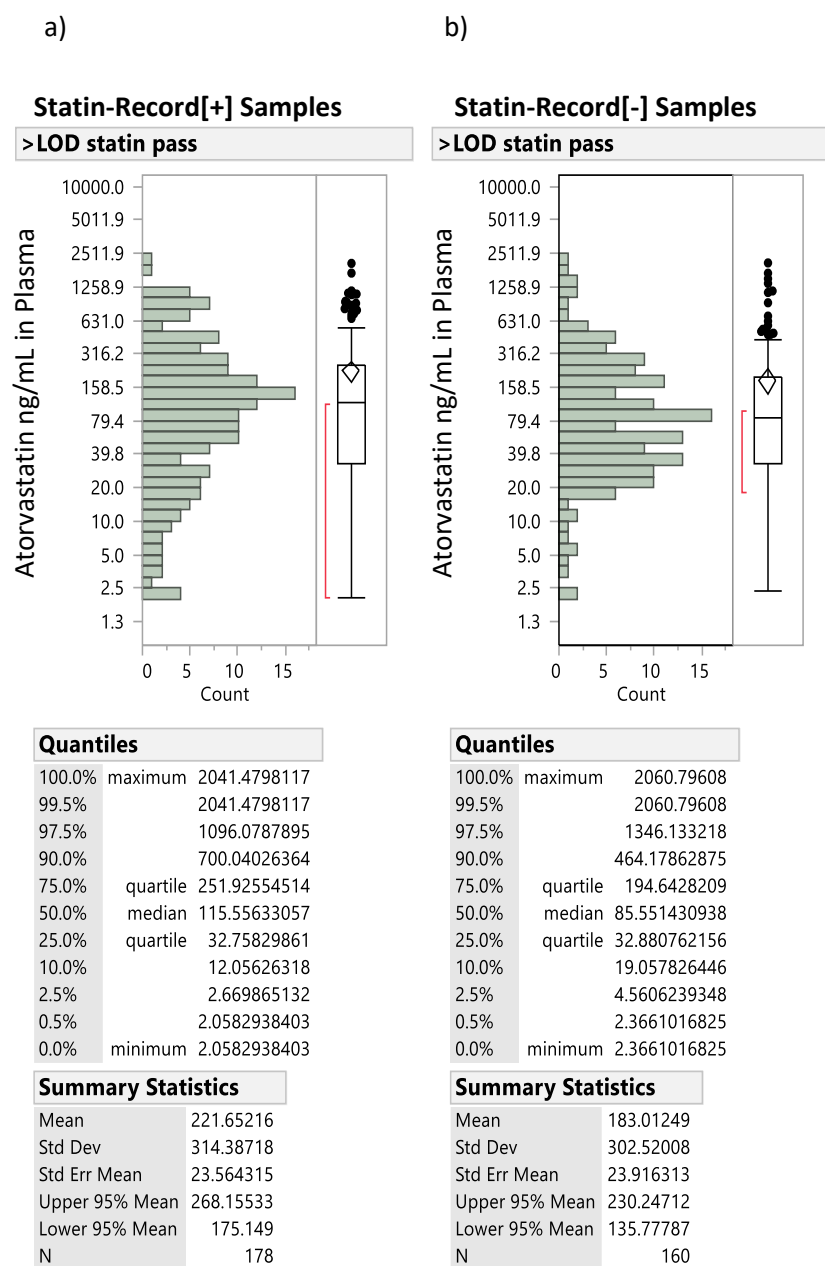

**Figure S4. Distribution Plot of Atorvastatin Detects.** Frequency distribution of detections for Atorvastatin Statin-Record [+] (a) and [-] (b) sample groups.



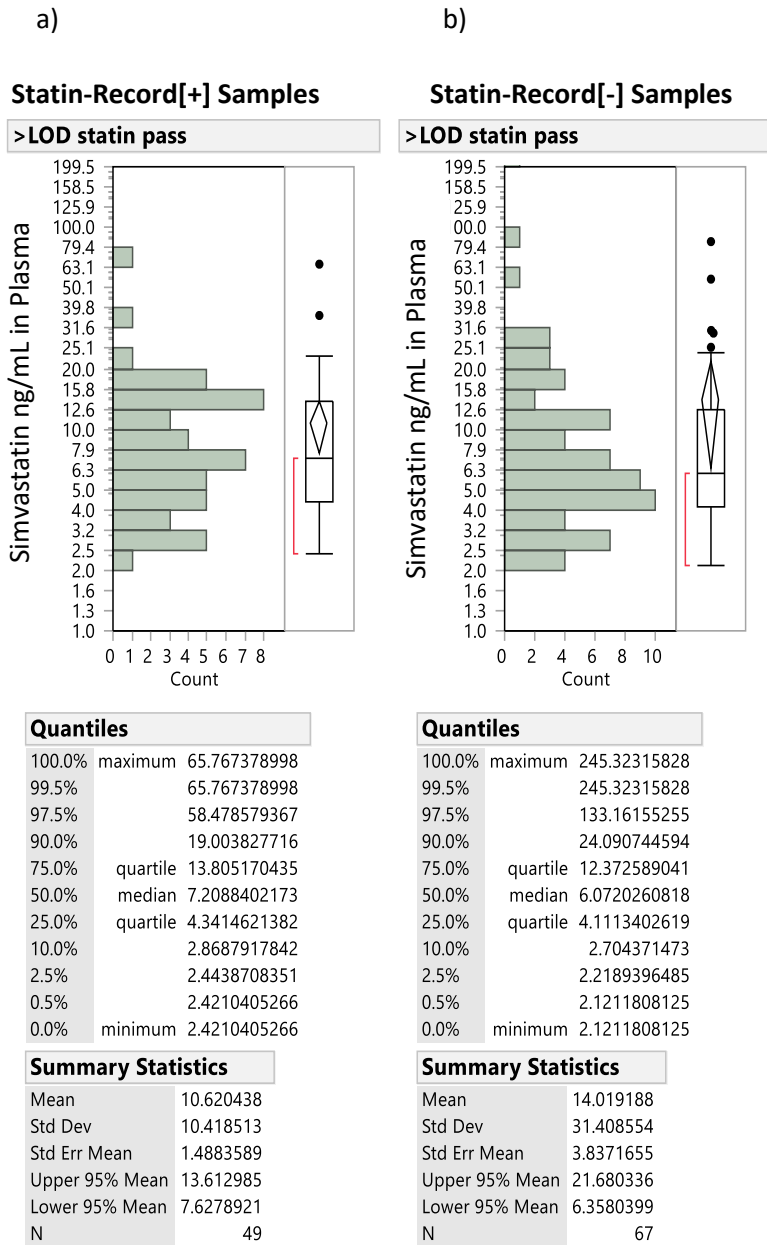

**Figure S5. Distribution Plot of Simvastatin Detections.** Frequency distribution of analytical detections for Simvastatin Statin-Record [+] (a) and [-] (b) sample groups.

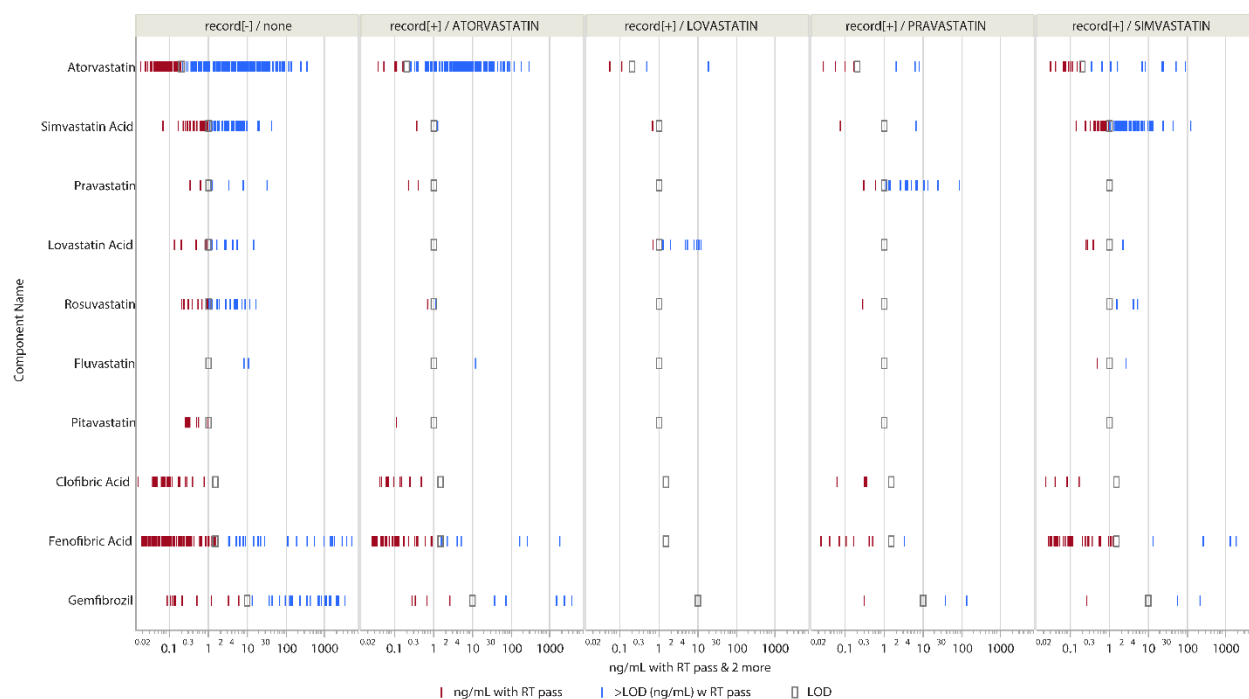

**Figure S6. Comparison of Analyte Concentration in Statin-Record[-] and Statin-Record[+].** Results of analysis for all samples with retention time criteria pass groups; the LOD levels are indicated by a small rectangle marker, above LOD level detect is shown with blue lines and below LOD level detect with red lines.

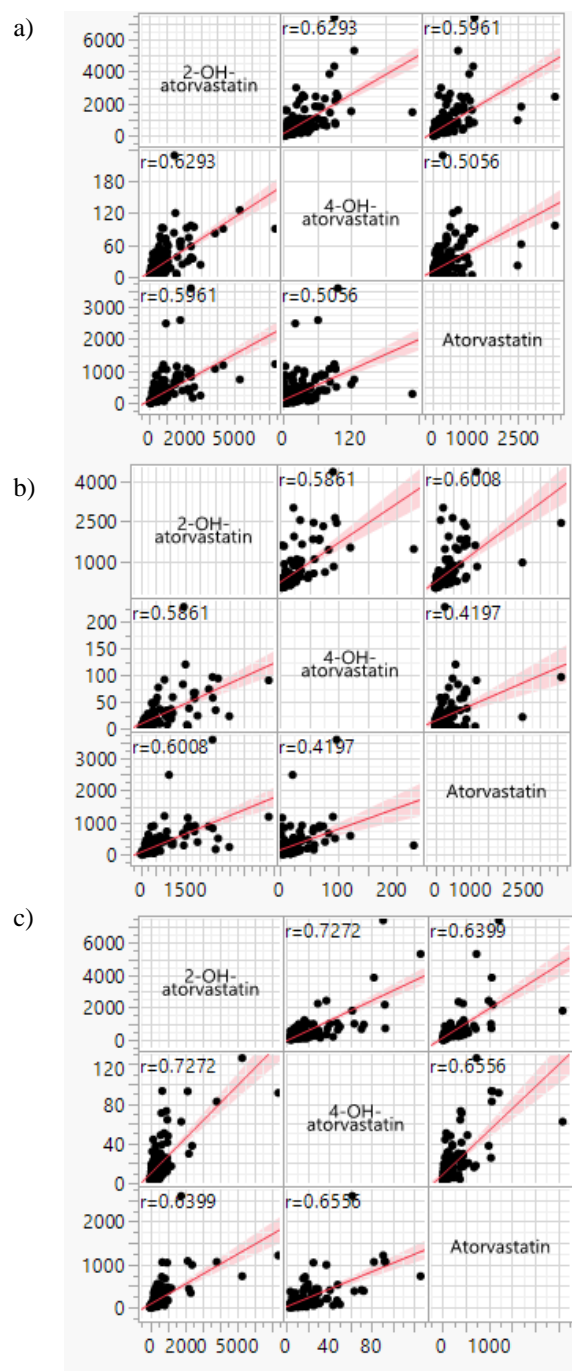

**Figure S7: Correlation between Atorvastatin and its Metabolites.** a) All samples; b) Statin-Record[-] samples c): Statin-Record[+] samples. All correlations had p-value < 0.0001.
