# Supplementary material for: Confirmation of Statin and Fibrate Use from Small-Volume Archived Plasma Samples by High-Throughput LC-MS/MS Method
Source: Int J Mol Sci. 2023 Apr 27;24(9):7931. doi: 10.3390/ijms24097931 (PMC10178340; doi:10.3390/ijms24097931)
Supplement: Supplementary file 1 [file ijms-24-07931-s001.zip › Supplementary Tables.xlsx]

## Sheet: Table S1
Table S1: Statin and Fibrate Data Table
Sample ID	record[+]/[-]	GENERIC NAME	Statin Detect Name	Generic Analyte Name	>LOD statin ng/mL	Fibrate Detect Name	>LOD fibrate pass	statin [+]/[-]	fibrate [+]/[-]	record/statin	record/statin/fibrate
Sample 1	record[+]	ATORVASTATIN	2-OH-atorvastatin	Atorvastatin	109.281			statin[+]		record[+] / statin[+]	record[+] / statin[+]
Sample 2	record[-]	none						statin[-]			record[-] / statin[-]
Sample 3	record[+]	ATORVASTATIN	2-OH-atorvastatin	Atorvastatin	999.262			statin[+]		record[+] / statin[+]	record[+] / statin[+]
Sample 4	record[+]	SIMVASTATIN	Simvastatin Acid	Simvastatin	10.735			statin[+]		record[+] / statin[+]	record[+] / statin[+]
Sample 5	record[+]	LOVASTATIN	2-OH-atorvastatin	Atorvastatin	32.9515			statin[+]		record[+] / statin[+]	record[+] / statin[+]
Sample 6	record[-]	none	2-OH-atorvastatin	Atorvastatin	8.14151			statin[+]		record[-] / statin[+]	record[-] / statin[+]
Sample 7	record[-]	none	Simvastatin Acid	Simvastatin	6.36002			statin[+]		record[-] / statin[+]	record[-] / statin[+]
Sample 8	record[-]	none				Gemfibrozil	2023.68	statin[+]	fibrate[+]	record[-] / statin[+]	record[-] / statin[+] / fibrate[+]
Sample 9	record[-]	none	2-OH-atorvastatin	Atorvastatin	149.05			statin[+]		record[-] / statin[+]	record[-] / statin[+]
Sample 10	record[+]	SIMVASTATIN	Simvastatin Acid	Simvastatin	20.7861			statin[+]		record[+] / statin[+]	record[+] / statin[+]
Sample 11	record[-]	none	Atorvastatin	Atorvastatin	96.424			statin[+]		record[-] / statin[+]	record[-] / statin[+]
Sample 12	record[-]	none	2-OH-atorvastatin	Atorvastatin	88.1924			statin[+]		record[-] / statin[+]	record[-] / statin[+]
Sample 13	record[-]	none						statin[-]			record[-] / statin[-]
Sample 14	record[-]	none	Simvastatin Acid	Simvastatin	4.86231			statin[+]		record[-] / statin[+]	record[-] / statin[+]
Sample 15	record[-]	none	2-OH-atorvastatin	Atorvastatin	25.5121			statin[+]		record[-] / statin[+]	record[-] / statin[+]
Sample 16	record[+]	SIMVASTATIN						statin[-]			record[+] / statin[-]
Sample 17	record[-]	none						statin[-]			record[-] / statin[-]
Sample 18	record[+]	SIMVASTATIN						statin[-]			record[+] / statin[-]
Sample 19	record[-]	none						statin[-]			record[-] / statin[-]
Sample 20	record[-]	none						statin[-]			record[-] / statin[-]
Sample 21	record[-]	none	Simvastatin Acid	Simvastatin	6.63985			statin[+]		record[-] / statin[+]	record[-] / statin[+]
Sample 22	record[+]	ATORVASTATIN						statin[-]			record[+] / statin[-]
Sample 23	record[-]	none						statin[-]			record[-] / statin[-]
Sample 24	record[+]	PRAVASTATIN						statin[-]			record[+] / statin[-]
Sample 25	record[-]	none	2-OH-atorvastatin	Atorvastatin	119.523			statin[+]		record[-] / statin[+]	record[-] / statin[+]
Sample 26	record[-]	none						statin[-]			record[-] / statin[-]
Sample 27	record[-]	none	2-OH-atorvastatin	Atorvastatin	2.84856			statin[+]		record[-] / statin[+]	record[-] / statin[+]
Sample 28	record[-]	none	Atorvastatin	Atorvastatin	386.203			statin[+]		record[-] / statin[+]	record[-] / statin[+]
Sample 29	record[-]	none						statin[-]			record[-] / statin[-]
Sample 30	record[+]	SIMVASTATIN						statin[-]			record[+] / statin[-]
Sample 31	record[-]	none	Rosuvastatin	Rosuvastatin	7.49046			statin[+]		record[-] / statin[+]	record[-] / statin[+]
Sample 32	record[-]	none						statin[-]			record[-] / statin[-]
Sample 33	record[-]	none	Rosuvastatin	Rosuvastatin	12.1123			statin[+]		record[-] / statin[+]	record[-] / statin[+]
Sample 34	record[-]	none						statin[-]			record[-] / statin[-]
Sample 35	record[-]	none						statin[-]			record[-] / statin[-]
Sample 36	record[-]	none	2-OH-atorvastatin	Atorvastatin	22.305			statin[+]		record[-] / statin[+]	record[-] / statin[+]
Sample 37	record[+]	ATORVASTATIN	2-OH-atorvastatin	Atorvastatin	112.746			statin[+]		record[+] / statin[+]	record[+] / statin[+]
Sample 38	record[-]	none	Lovastatin acid	Lovastatin acid	3.67718			statin[+]		record[-] / statin[+]	record[-] / statin[+]
Sample 39	record[+]	ATORVASTATIN	2-OH-atorvastatin	Atorvastatin	468.275			statin[+]		record[+] / statin[+]	record[+] / statin[+]
Sample 40	record[+]	LOVASTATIN	Lovastatin acid	Lovastatin acid	22.0484			statin[+]		record[+] / statin[+]	record[+] / statin[+]
Sample 41	record[+]	ROSUVASTATIN						statin[-]			record[+] / statin[-]
Sample 42	record[-]	none						statin[-]			record[-] / statin[-]
Sample 43	record[+]	SIMVASTATIN				Fenofibric acid	34125.1	statin[-]			record[+] / statin[-]
Sample 44	record[-]	none						statin[-]			record[-] / statin[-]
Sample 45	record[-]	none	Simvastatin Acid	Simvastatin	2.51236			statin[+]		record[-] / statin[+]	record[-] / statin[+]
Sample 46	record[-]	none						statin[-]			record[-] / statin[-]
Sample 47	record[+]	SIMVASTATIN	Simvastatin Acid	Simvastatin	4.12849			statin[+]		record[+] / statin[+]	record[+] / statin[+]
Sample 48	record[-]	none				Gemfibrozil	2509.5	statin[+]	fibrate[+]	record[-] / statin[+]	record[-] / statin[+] / fibrate[+]
Sample 49	record[-]	none	Atorvastatin	Atorvastatin	39.8463			statin[+]		record[-] / statin[+]	record[-] / statin[+]
Sample 50	record[-]	none						statin[-]			record[-] / statin[-]
Sample 51	record[+]	ATORVASTATIN	Atorvastatin	Atorvastatin	1057.75			statin[+]		record[+] / statin[+]	record[+] / statin[+]
Sample 52	record[+]	ATORVASTATIN				Fenofibric acid	33488.3	statin[-]			record[+] / statin[-]
Sample 53	record[-]	none				Fenofibric acid	95.311	statin[-]			record[-] / statin[-]
Sample 54	record[-]	none						statin[-]			record[-] / statin[-]
Sample 55	record[+]	SIMVASTATIN						statin[-]			record[+] / statin[-]
Sample 56	record[-]	none						statin[-]			record[-] / statin[-]
Sample 57	record[-]	none				Fenofibric acid	34958.1	statin[-]			record[-] / statin[-]
Sample 58	record[+]	SIMVASTATIN	Simvastatin Acid	Simvastatin	12.5423			statin[+]		record[+] / statin[+]	record[+] / statin[+]
Sample 59	record[+]	ROSUVASTATIN	Rosuvastatin	Rosuvastatin	3.50469			statin[+]		record[+] / statin[+]	record[+] / statin[+]
Sample 60	record[-]	none						statin[-]			record[-] / statin[-]
Sample 61	record[-]	none	2-OH-atorvastatin	Atorvastatin	367.865			statin[+]		record[-] / statin[+]	record[-] / statin[+]
Sample 62	record[-]	none						statin[-]			record[-] / statin[-]
Sample 63	record[+]	SIMVASTATIN	Simvastatin Acid	Simvastatin	16.3315			statin[+]		record[+] / statin[+]	record[+] / statin[+]
Sample 64	record[+]	SIMVASTATIN	Simvastatin Acid	Simvastatin	2.60521			statin[+]		record[+] / statin[+]	record[+] / statin[+]
Sample 65	record[+]	ATORVASTATIN	2-OH-atorvastatin	Atorvastatin	429.164			statin[+]		record[+] / statin[+]	record[+] / statin[+]
Sample 66	record[-]	none						statin[-]			record[-] / statin[-]
Sample 67	record[+]	ATORVASTATIN	2-OH-atorvastatin	Atorvastatin	73.3997			statin[+]		record[+] / statin[+]	record[+] / statin[+]
Sample 68	record[+]	ATORVASTATIN	2-OH-atorvastatin	Atorvastatin	201.06			statin[+]		record[+] / statin[+]	record[+] / statin[+]
Sample 69	record[-]	none						statin[-]			record[-] / statin[-]
Sample 70	record[-]	none	2-OH-atorvastatin	Atorvastatin	426.224			statin[+]		record[-] / statin[+]	record[-] / statin[+]
Sample 71	record[+]	ATORVASTATIN	Atorvastatin	Atorvastatin	718.963			statin[+]		record[+] / statin[+]	record[+] / statin[+]
Sample 72	record[-]	none				Gemfibrozil	1174.1	statin[+]	fibrate[+]	record[-] / statin[+]	record[-] / statin[+] / fibrate[+]
Sample 73	record[-]	none	2-OH-atorvastatin	Atorvastatin	1080.29			statin[+]		record[-] / statin[+]	record[-] / statin[+]
Sample 74	record[-]	none						statin[-]			record[-] / statin[-]
Sample 75	record[-]	none						statin[-]			record[-] / statin[-]
Sample 76	record[-]	none	Simvastatin Acid	Simvastatin	6.51907			statin[+]		record[-] / statin[+]	record[-] / statin[+]
Sample 77	record[-]	none						statin[-]			record[-] / statin[-]
Sample 78	record[+]	FLUVASTATIN						statin[-]			record[+] / statin[-]
Sample 79	record[-]	none	2-OH-atorvastatin	Atorvastatin	156.55			statin[+]		record[-] / statin[+]	record[-] / statin[+]
Sample 80	record[-]	none						statin[-]			record[-] / statin[-]
Sample 81	record[+]	ATORVASTATIN	2-OH-atorvastatin	Atorvastatin	13.1046			statin[+]		record[+] / statin[+]	record[+] / statin[+]
Sample 82	record[+]	SIMVASTATIN	Simvastatin Acid	Simvastatin	9.3653			statin[+]		record[+] / statin[+]	record[+] / statin[+]
Sample 83	record[+]	ATORVASTATIN	Atorvastatin	Atorvastatin	49.3451			statin[+]		record[+] / statin[+]	record[+] / statin[+]
Sample 84	record[-]	none						statin[-]			record[-] / statin[-]
Sample 85	record[-]	none	2-OH-atorvastatin	Atorvastatin	168.72			statin[+]		record[-] / statin[+]	record[-] / statin[+]
Sample 86	record[+]	ATORVASTATIN	2-OH-atorvastatin	Atorvastatin	93.7317			statin[+]		record[+] / statin[+]	record[+] / statin[+]
Sample 87	record[-]	none	2-OH-atorvastatin	Atorvastatin	1836.1			statin[+]		record[-] / statin[+]	record[-] / statin[+]
Sample 88	record[+]	ATORVASTATIN	2-OH-atorvastatin	Atorvastatin	289.93			statin[+]		record[+] / statin[+]	record[+] / statin[+]
Sample 89	record[+]	FLUVASTATIN	Fluvastatin	Fluvastatin	8.21628			statin[+]		record[+] / statin[+]	record[+] / statin[+]
Sample 90	record[-]	none	Pravastatin	Pravastatin	2.66486			statin[+]		record[-] / statin[+]	record[-] / statin[+]
Sample 91	record[-]	none						statin[-]			record[-] / statin[-]
Sample 92	record[+]	ATORVASTATIN	2-OH-atorvastatin	Atorvastatin	144.701			statin[+]		record[+] / statin[+]	record[+] / statin[+]
Sample 93	record[-]	none						statin[-]			record[-] / statin[-]
Sample 94	record[-]	none						statin[-]			record[-] / statin[-]
Sample 95	record[+]	SIMVASTATIN						statin[-]			record[+] / statin[-]
Sample 96	record[-]	none	2-OH-atorvastatin	Atorvastatin	488.538			statin[+]		record[-] / statin[+]	record[-] / statin[+]
Sample 97	record[+]	ATORVASTATIN	2-OH-atorvastatin	Atorvastatin	240.458			statin[+]		record[+] / statin[+]	record[+] / statin[+]
Sample 98	record[-]	none						statin[-]			record[-] / statin[-]
Sample 99	record[+]	ATORVASTATIN	2-OH-atorvastatin	Atorvastatin	81.5671			statin[+]		record[+] / statin[+]	record[+] / statin[+]
Sample 100	record[-]	none	2-OH-atorvastatin	Atorvastatin	35.6518			statin[+]		record[-] / statin[+]	record[-] / statin[+]
Sample 101	record[-]	none						statin[-]			record[-] / statin[-]
Sample 102	record[-]	none						statin[-]			record[-] / statin[-]
Sample 103	record[-]	none						statin[-]			record[-] / statin[-]
Sample 104	record[-]	none						statin[-]			record[-] / statin[-]
Sample 105	record[+]	ATORVASTATIN	2-OH-atorvastatin	Atorvastatin	49.2508			statin[+]		record[+] / statin[+]	record[+] / statin[+]
Sample 106	record[+]	SIMVASTATIN	Simvastatin Acid	Simvastatin	2.97353			statin[+]		record[+] / statin[+]	record[+] / statin[+]
Sample 107	record[-]	none	Simvastatin Acid	Simvastatin	5.52333			statin[+]		record[-] / statin[+]	record[-] / statin[+]
Sample 108	record[-]	none	2-OH-atorvastatin	Atorvastatin	307.351			statin[+]		record[-] / statin[+]	record[-] / statin[+]
Sample 109	record[-]	none						statin[-]			record[-] / statin[-]
Sample 110	record[-]	none	2-OH-atorvastatin	Atorvastatin	597.812			statin[+]		record[-] / statin[+]	record[-] / statin[+]
Sample 111	record[-]	none						statin[-]			record[-] / statin[-]
Sample 112	record[-]	none						statin[-]			record[-] / statin[-]
Sample 113	record[+]	ATORVASTATIN	2-OH-atorvastatin	Atorvastatin	256.993			statin[+]		record[+] / statin[+]	record[+] / statin[+]
Sample 114	record[-]	none						statin[-]			record[-] / statin[-]
Sample 115	record[+]	PRAVASTATIN				Gemfibrozil	55.576	statin[+]	fibrate[+]	record[+] / statin[+]	record[+] / statin[+] / fibrate[+]
Sample 116	record[+]	ATORVASTATIN	2-OH-atorvastatin	Atorvastatin	69.5939			statin[+]		record[+] / statin[+]	record[+] / statin[+]
Sample 117	record[+]	ATORVASTATIN	2-OH-atorvastatin	Atorvastatin	215.414			statin[+]		record[+] / statin[+]	record[+] / statin[+]
Sample 118	record[-]	none	2-OH-atorvastatin	Atorvastatin	17.2057			statin[+]		record[-] / statin[+]	record[-] / statin[+]
Sample 119	record[-]	none	Simvastatin Acid	Simvastatin	10.7304			statin[+]		record[-] / statin[+]	record[-] / statin[+]
Sample 120	record[-]	none						statin[-]			record[-] / statin[-]
Sample 121	record[+]	ATORVASTATIN	2-OH-atorvastatin	Atorvastatin	28.0171			statin[+]		record[+] / statin[+]	record[+] / statin[+]
Sample 122	record[-]	none				Gemfibrozil	200.845	statin[+]	fibrate[+]	record[-] / statin[+]	record[-] / statin[+] / fibrate[+]
Sample 123	record[+]	PRAVASTATIN	Pravastatin	Pravastatin	106.151			statin[+]		record[+] / statin[+]	record[+] / statin[+]
Sample 124	record[-]	none						statin[-]			record[-] / statin[-]
Sample 125	record[-]	none						statin[-]			record[-] / statin[-]
Sample 126	record[-]	none	Simvastatin Acid	Simvastatin	3.12433			statin[+]		record[-] / statin[+]	record[-] / statin[+]
Sample 127	record[-]	none						statin[-]			record[-] / statin[-]
Sample 128	record[+]	SIMVASTATIN						statin[-]			record[+] / statin[-]
Sample 129	record[-]	none						statin[-]			record[-] / statin[-]
Sample 130	record[+]	ATORVASTATIN						statin[-]			record[+] / statin[-]
Sample 131	record[-]	none						statin[-]			record[-] / statin[-]
Sample 132	record[-]	none						statin[-]			record[-] / statin[-]
Sample 133	record[-]	none						statin[-]			record[-] / statin[-]
Sample 134	record[-]	none	2-OH-atorvastatin	Atorvastatin	121.847			statin[+]		record[-] / statin[+]	record[-] / statin[+]
Sample 135	record[-]	none						statin[-]			record[-] / statin[-]
Sample 136	record[-]	none						statin[-]			record[-] / statin[-]
Sample 137	record[+]	ATORVASTATIN	2-OH-atorvastatin	Atorvastatin	162.393			statin[+]		record[+] / statin[+]	record[+] / statin[+]
Sample 138	record[-]	none						statin[-]			record[-] / statin[-]
Sample 139	record[+]	ATORVASTATIN	2-OH-atorvastatin	Atorvastatin	23.2682			statin[+]		record[+] / statin[+]	record[+] / statin[+]
Sample 140	record[-]	none						statin[-]			record[-] / statin[-]
Sample 141	record[-]	none						statin[-]			record[-] / statin[-]
Sample 142	record[-]	none						statin[-]			record[-] / statin[-]
Sample 143	record[-]	none						statin[-]			record[-] / statin[-]
Sample 144	record[-]	none						statin[-]			record[-] / statin[-]
Sample 145	record[-]	none	2-OH-atorvastatin	Atorvastatin	128.006			statin[+]		record[-] / statin[+]	record[-] / statin[+]
Sample 146	record[-]	none	2-OH-atorvastatin	Atorvastatin	591.767			statin[+]		record[-] / statin[+]	record[-] / statin[+]
Sample 147	record[-]	none						statin[-]			record[-] / statin[-]
Sample 148	record[-]	none						statin[-]			record[-] / statin[-]
Sample 149	record[-]	none						statin[-]			record[-] / statin[-]
Sample 150	record[+]	ATORVASTATIN	2-OH-atorvastatin	Atorvastatin	663.903			statin[+]		record[+] / statin[+]	record[+] / statin[+]
Sample 151	record[+]	LOVASTATIN	Lovastatin acid	Lovastatin acid	6.01148			statin[+]		record[+] / statin[+]	record[+] / statin[+]
Sample 152	record[-]	none						statin[-]			record[-] / statin[-]
Sample 153	record[-]	none	2-OH-atorvastatin	Atorvastatin	400.431			statin[+]		record[-] / statin[+]	record[-] / statin[+]
Sample 154	record[+]	LOVASTATIN						statin[-]			record[+] / statin[-]
Sample 155	record[-]	none						statin[-]			record[-] / statin[-]
Sample 156	record[-]	none						statin[-]			record[-] / statin[-]
Sample 157	record[-]	none	Rosuvastatin	Rosuvastatin	9.08772			statin[+]		record[-] / statin[+]	record[-] / statin[+]
Sample 158	record[-]	none	2-OH-atorvastatin	Atorvastatin	181.015			statin[+]		record[-] / statin[+]	record[-] / statin[+]
Sample 159	record[-]	none	Simvastatin Acid	Simvastatin	4.15556			statin[+]		record[-] / statin[+]	record[-] / statin[+]
Sample 160	record[-]	none	2-OH-atorvastatin	Atorvastatin	18.9572			statin[+]		record[-] / statin[+]	record[-] / statin[+]
Sample 161	record[+]	ATORVASTATIN	2-OH-atorvastatin	Atorvastatin	381.45			statin[+]		record[+] / statin[+]	record[+] / statin[+]
Sample 162	record[-]	none	Atorvastatin	Atorvastatin	17.9427			statin[+]		record[-] / statin[+]	record[-] / statin[+]
Sample 163	record[-]	none	2-OH-atorvastatin	Atorvastatin	20.5262			statin[+]		record[-] / statin[+]	record[-] / statin[+]
Sample 164	record[-]	none						statin[-]			record[-] / statin[-]
Sample 165	record[+]	ATORVASTATIN	2-OH-atorvastatin	Atorvastatin	36.0416			statin[+]		record[+] / statin[+]	record[+] / statin[+]
Sample 166	record[+]	PRAVASTATIN	2-OH-atorvastatin	Atorvastatin	36.1633			statin[+]		record[+] / statin[+]	record[+] / statin[+]
Sample 167	record[-]	none	2-OH-atorvastatin	Atorvastatin	19.0345			statin[+]		record[-] / statin[+]	record[-] / statin[+]
Sample 168	record[-]	none	2-OH-atorvastatin	Atorvastatin	116.189			statin[+]		record[-] / statin[+]	record[-] / statin[+]
Sample 169	record[+]	ATORVASTATIN	2-OH-atorvastatin	Atorvastatin	53.177			statin[+]		record[+] / statin[+]	record[+] / statin[+]
Sample 170	record[-]	none						statin[-]			record[-] / statin[-]
Sample 171	record[+]	SIMVASTATIN				Fenofibric acid	19097.3	statin[-]			record[+] / statin[-]
Sample 172	record[-]	none						statin[-]			record[-] / statin[-]
Sample 173	record[+]	PRAVASTATIN	Pravastatin	Pravastatin	9.15281			statin[+]		record[+] / statin[+]	record[+] / statin[+]
Sample 174	record[+]	ATORVASTATIN	2-OH-atorvastatin	Atorvastatin	75.2701			statin[+]		record[+] / statin[+]	record[+] / statin[+]
Sample 175	record[+]	SIMVASTATIN						statin[-]			record[+] / statin[-]
Sample 176	record[-]	none	2-OH-atorvastatin	Atorvastatin	246.749			statin[+]		record[-] / statin[+]	record[-] / statin[+]
Sample 177	record[+]	SIMVASTATIN/EZE						statin[-]			record[+] / statin[-]
Sample 178	record[+]	PRAVASTATIN	Pravastatin	Pravastatin	16.5301			statin[+]		record[+] / statin[+]	record[+] / statin[+]
Sample 179	record[-]	none	2-OH-atorvastatin	Atorvastatin	1635.05			statin[+]		record[-] / statin[+]	record[-] / statin[+]
Sample 180	record[-]	none	2-OH-atorvastatin	Atorvastatin	594.634			statin[+]		record[-] / statin[+]	record[-] / statin[+]
Sample 181	record[-]	none	2-OH-atorvastatin	Atorvastatin	503.304			statin[+]		record[-] / statin[+]	record[-] / statin[+]
Sample 182	record[-]	none						statin[-]			record[-] / statin[-]
Sample 183	record[+]	LOVASTATIN						statin[-]			record[+] / statin[-]
Sample 184	record[-]	none	2-OH-atorvastatin	Atorvastatin	208.887			statin[+]		record[-] / statin[+]	record[-] / statin[+]
Sample 185	record[-]	none	Atorvastatin	Atorvastatin	4.23093			statin[+]		record[-] / statin[+]	record[-] / statin[+]
Sample 186	record[+]	SIMVASTATIN	Simvastatin Acid	Simvastatin	10.7354			statin[+]		record[+] / statin[+]	record[+] / statin[+]
Sample 187	record[-]	none	2-OH-atorvastatin	Atorvastatin	333.045			statin[+]		record[-] / statin[+]	record[-] / statin[+]
Sample 188	record[-]	none	Simvastatin Acid	Simvastatin	65.7674			statin[+]		record[-] / statin[+]	record[-] / statin[+]
Sample 189	record[+]	ATORVASTATIN	2-OH-atorvastatin	Atorvastatin	33.3235			statin[+]		record[+] / statin[+]	record[+] / statin[+]
Sample 190	record[-]	none						statin[-]			record[-] / statin[-]
Sample 191	record[-]	none	Atorvastatin	Atorvastatin	3.71685			statin[+]		record[-] / statin[+]	record[-] / statin[+]
Sample 192	record[-]	none	2-OH-atorvastatin	Atorvastatin	2619.39			statin[+]		record[-] / statin[+]	record[-] / statin[+]
Sample 193	record[+]	SIMVASTATIN	Rosuvastatin	Rosuvastatin	10.2997			statin[+]		record[+] / statin[+]	record[+] / statin[+]
Sample 194	record[+]	ROSUVASTATIN	Rosuvastatin	Rosuvastatin	8.81169			statin[+]		record[+] / statin[+]	record[+] / statin[+]
Sample 195	record[-]	none						statin[-]			record[-] / statin[-]
Sample 196	record[+]	ATORVASTATIN	Atorvastatin	Atorvastatin	3.97866			statin[+]		record[+] / statin[+]	record[+] / statin[+]
Sample 197	record[-]	none	Rosuvastatin	Rosuvastatin	3.50902			statin[+]		record[-] / statin[+]	record[-] / statin[+]
Sample 198	record[-]	none						statin[-]			record[-] / statin[-]
Sample 199	record[-]	none	2-OH-atorvastatin	Atorvastatin	439.127			statin[+]		record[-] / statin[+]	record[-] / statin[+]
Sample 200	record[+]	SIMVASTATIN	Rosuvastatin	Rosuvastatin	3.25224			statin[+]		record[+] / statin[+]	record[+] / statin[+]
Sample 201	record[+]	ATORVASTATIN	2-OH-atorvastatin	Atorvastatin	609.979			statin[+]		record[+] / statin[+]	record[+] / statin[+]
Sample 202	record[-]	none						statin[-]			record[-] / statin[-]
Sample 203	record[-]	none	2-OH-atorvastatin	Atorvastatin	4.58588			statin[+]		record[-] / statin[+]	record[-] / statin[+]
Sample 204	record[-]	none	2-OH-atorvastatin	Atorvastatin	238.587			statin[+]		record[-] / statin[+]	record[-] / statin[+]
Sample 205	record[-]	none						statin[-]			record[-] / statin[-]
Sample 206	record[+]	SIMVASTATIN	Simvastatin Acid	Simvastatin	4.69948			statin[+]		record[+] / statin[+]	record[+] / statin[+]
Sample 207	record[+]	LOVASTATIN	Lovastatin acid	Lovastatin acid	2.98403			statin[+]		record[+] / statin[+]	record[+] / statin[+]
Sample 208	record[+]	ATORVASTATIN	2-OH-atorvastatin	Atorvastatin	88.6304			statin[+]		record[+] / statin[+]	record[+] / statin[+]
Sample 209	record[-]	none						statin[-]			record[-] / statin[-]
Sample 210	record[-]	none						statin[-]			record[-] / statin[-]
Sample 211	record[+]	SIMVASTATIN	Simvastatin Acid	Simvastatin	17.7666			statin[+]		record[+] / statin[+]	record[+] / statin[+]
Sample 212	record[+]	ATORVASTATIN	2-OH-atorvastatin	Atorvastatin	227.476			statin[+]		record[+] / statin[+]	record[+] / statin[+]
Sample 213	record[-]	none	Pravastatin	Pravastatin	8.17771			statin[+]		record[-] / statin[+]	record[-] / statin[+]
Sample 214	record[-]	none	2-OH-atorvastatin	Atorvastatin	662.837			statin[+]		record[-] / statin[+]	record[-] / statin[+]
Sample 215	record[-]	none						statin[-]			record[-] / statin[-]
Sample 216	record[-]	none						statin[-]			record[-] / statin[-]
Sample 217	record[-]	none	2-OH-atorvastatin	Atorvastatin	488.251			statin[+]		record[-] / statin[+]	record[-] / statin[+]
Sample 218	record[-]	none	2-OH-atorvastatin	Atorvastatin	2535.72			statin[+]		record[-] / statin[+]	record[-] / statin[+]
Sample 219	record[-]	none	Atorvastatin	Atorvastatin	2.333			statin[+]		record[-] / statin[+]	record[-] / statin[+]
Sample 220	record[-]	none	2-OH-atorvastatin	Atorvastatin	226.222			statin[+]		record[-] / statin[+]	record[-] / statin[+]
Sample 221	record[+]	ATORVASTATIN	2-OH-atorvastatin	Atorvastatin	848.616			statin[+]		record[+] / statin[+]	record[+] / statin[+]
Sample 222	record[+]	ATORVASTATIN	2-OH-atorvastatin	Atorvastatin	2245.96			statin[+]		record[+] / statin[+]	record[+] / statin[+]
Sample 223	record[+]	ATORVASTATIN	2-OH-atorvastatin	Atorvastatin	253.615			statin[+]		record[+] / statin[+]	record[+] / statin[+]
Sample 224	record[+]	PRAVASTATIN	2-OH-atorvastatin	Atorvastatin	238.218			statin[+]		record[+] / statin[+]	record[+] / statin[+]
Sample 225	record[+]	ATORVASTATIN	2-OH-atorvastatin	Atorvastatin	207.908			statin[+]		record[+] / statin[+]	record[+] / statin[+]
Sample 226	record[-]	none						statin[-]			record[-] / statin[-]
Sample 227	record[-]	none						statin[-]			record[-] / statin[-]
Sample 228	record[-]	none	2-OH-atorvastatin	Atorvastatin	2997.77			statin[+]		record[-] / statin[+]	record[-] / statin[+]
Sample 229	record[-]	none						statin[-]			record[-] / statin[-]
Sample 230	record[+]	ATORVASTATIN	Atorvastatin	Atorvastatin	5.2399			statin[+]		record[+] / statin[+]	record[+] / statin[+]
Sample 231	record[-]	none						statin[-]			record[-] / statin[-]
Sample 232	record[-]	none						statin[-]			record[-] / statin[-]
Sample 233	record[+]	ROSUVASTATIN						statin[-]			record[+] / statin[-]
Sample 234	record[-]	none	Simvastatin Acid	Simvastatin	15.7734			statin[+]		record[-] / statin[+]	record[-] / statin[+]
Sample 235	record[+]	PRAVASTATIN	Pravastatin	Pravastatin	5.20929			statin[+]		record[+] / statin[+]	record[+] / statin[+]
Sample 236	record[-]	none						statin[-]			record[-] / statin[-]
Sample 237	record[-]	none						statin[-]			record[-] / statin[-]
Sample 238	record[+]	ATORVASTATIN	2-OH-atorvastatin	Atorvastatin	331.231			statin[+]		record[+] / statin[+]	record[+] / statin[+]
Sample 239	record[-]	none						statin[-]			record[-] / statin[-]
Sample 240	record[-]	none						statin[-]			record[-] / statin[-]
Sample 241	record[-]	none						statin[-]			record[-] / statin[-]
Sample 242	record[+]	ATORVASTATIN	2-OH-atorvastatin	Atorvastatin	408.313			statin[+]		record[+] / statin[+]	record[+] / statin[+]
Sample 243	record[+]	PRAVASTATIN						statin[-]			record[+] / statin[-]
Sample 244	record[+]	SIMVASTATIN/EZE	Simvastatin Acid	Simvastatin	5.93662			statin[+]		record[+] / statin[+]	record[+] / statin[+]
Sample 245	record[+]	ATORVASTATIN	2-OH-atorvastatin	Atorvastatin	2358.71	Fenofibric acid	38.5032	statin[+]		record[+] / statin[+]	record[+] / statin[+]
Sample 246	record[+]	ATORVASTATIN						statin[-]			record[+] / statin[-]
Sample 247	record[-]	none						statin[-]			record[-] / statin[-]
Sample 248	record[-]	none						statin[-]			record[-] / statin[-]
Sample 249	record[+]	ATORVASTATIN				Gemfibrozil	2049.3	statin[+]	fibrate[+]	record[+] / statin[+]	record[+] / statin[+] / fibrate[+]
Sample 250	record[-]	none						statin[-]			record[-] / statin[-]
Sample 251	record[-]	none						statin[-]			record[-] / statin[-]
Sample 252	record[-]	none						statin[-]			record[-] / statin[-]
Sample 253	record[-]	none						statin[-]			record[-] / statin[-]
Sample 254	record[+]	ATORVASTATIN	2-OH-atorvastatin	Atorvastatin	492.634			statin[+]		record[+] / statin[+]	record[+] / statin[+]
Sample 255	record[+]	ATORVASTATIN	2-OH-atorvastatin	Atorvastatin	3854.87	Fenofibric acid	68570.5	statin[+]		record[+] / statin[+]	record[+] / statin[+]
Sample 256	record[-]	none				Fenofibric acid	9092.37	statin[-]			record[-] / statin[-]
Sample 257	record[-]	none				Gemfibrozil	862.877	statin[+]	fibrate[+]	record[-] / statin[+]	record[-] / statin[+] / fibrate[+]
Sample 258	record[-]	none						statin[-]			record[-] / statin[-]
Sample 259	record[-]	none						statin[-]			record[-] / statin[-]
Sample 260	record[-]	none						statin[-]			record[-] / statin[-]
Sample 261	record[-]	none	Simvastatin Acid	Simvastatin	6.9865			statin[+]		record[-] / statin[+]	record[-] / statin[+]
Sample 262	record[-]	none	2-OH-atorvastatin	Atorvastatin	37.3583			statin[+]		record[-] / statin[+]	record[-] / statin[+]
Sample 263	record[+]	LOVASTATIN						statin[-]			record[+] / statin[-]
Sample 264	record[+]	ATORVASTATIN	2-OH-atorvastatin	Atorvastatin	763.865			statin[+]		record[+] / statin[+]	record[+] / statin[+]
Sample 265	record[-]	none						statin[-]			record[-] / statin[-]
Sample 266	record[-]	none						statin[-]			record[-] / statin[-]
Sample 267	record[+]	ATORVASTATIN						statin[-]			record[+] / statin[-]
Sample 268	record[+]	ATORVASTATIN	2-OH-atorvastatin	Atorvastatin	46.6661			statin[+]		record[+] / statin[+]	record[+] / statin[+]
Sample 269	record[-]	none	2-OH-atorvastatin	Atorvastatin	550.444			statin[+]		record[-] / statin[+]	record[-] / statin[+]
Sample 270	record[-]	none						statin[-]			record[-] / statin[-]
Sample 271	record[+]	SIMVASTATIN	Simvastatin Acid	Simvastatin	5.76131			statin[+]		record[+] / statin[+]	record[+] / statin[+]
Sample 272	record[+]	SIMVASTATIN	Simvastatin Acid	Simvastatin	8.6092			statin[+]		record[+] / statin[+]	record[+] / statin[+]
Sample 273	record[-]	none						statin[-]			record[-] / statin[-]
Sample 274	record[-]	none	Atorvastatin	Atorvastatin	2.05829			statin[+]		record[-] / statin[+]	record[-] / statin[+]
Sample 275	record[-]	none						statin[-]			record[-] / statin[-]
Sample 276	record[-]	none						statin[-]			record[-] / statin[-]
Sample 277	record[-]	none						statin[-]			record[-] / statin[-]
Sample 278	record[-]	none	Simvastatin Acid	Simvastatin	3.44071			statin[+]		record[-] / statin[+]	record[-] / statin[+]
Sample 279	record[-]	none	2-OH-atorvastatin	Atorvastatin	496.676			statin[+]		record[-] / statin[+]	record[-] / statin[+]
Sample 280	record[+]	SIMVASTATIN/EZE						statin[-]			record[+] / statin[-]
Sample 281	record[+]	ATORVASTATIN	2-OH-atorvastatin	Atorvastatin	121.96			statin[+]		record[+] / statin[+]	record[+] / statin[+]
Sample 282	record[-]	none	2-OH-atorvastatin	Atorvastatin	173.262			statin[+]		record[-] / statin[+]	record[-] / statin[+]
Sample 283	record[-]	none						statin[-]			record[-] / statin[-]
Sample 284	record[-]	none						statin[-]			record[-] / statin[-]
Sample 285	record[-]	none	Rosuvastatin	Rosuvastatin	16.949			statin[+]		record[-] / statin[+]	record[-] / statin[+]
Sample 286	record[+]	SIMVASTATIN				Gemfibrozil	133.278	statin[+]	fibrate[+]	record[+] / statin[+]	record[+] / statin[+] / fibrate[+]
Sample 287	record[+]	ATORVASTATIN	2-OH-atorvastatin	Atorvastatin	97.3267			statin[+]		record[+] / statin[+]	record[+] / statin[+]
Sample 288	record[-]	none						statin[-]			record[-] / statin[-]
Sample 289	record[-]	none						statin[-]			record[-] / statin[-]
Sample 290	record[+]	PRAVASTATIN	Pravastatin	Pravastatin	50.7496	Fenofibric acid	76.7884	statin[+]		record[+] / statin[+]	record[+] / statin[+]
Sample 291	record[+]	LOVASTATIN	Lovastatin acid	Lovastatin acid	10.1489			statin[+]		record[+] / statin[+]	record[+] / statin[+]
Sample 292	record[-]	none						statin[-]			record[-] / statin[-]
Sample 293	record[+]	ATORVASTATIN	2-OH-atorvastatin	Atorvastatin	31.5413			statin[+]		record[+] / statin[+]	record[+] / statin[+]
Sample 294	record[-]	none						statin[-]			record[-] / statin[-]
Sample 295	record[-]	none						statin[-]			record[-] / statin[-]
Sample 296	record[-]	none						statin[-]			record[-] / statin[-]
Sample 297	record[-]	none				Gemfibrozil	987.744	statin[+]	fibrate[+]	record[-] / statin[+]	record[-] / statin[+] / fibrate[+]
Sample 298	record[-]	none	2-OH-atorvastatin	Atorvastatin	127.717			statin[+]		record[-] / statin[+]	record[-] / statin[+]
Sample 299	record[+]	ATORVASTATIN	2-OH-atorvastatin	Atorvastatin	178.416			statin[+]		record[+] / statin[+]	record[+] / statin[+]
Sample 300	record[+]	ATORVASTATIN	Atorvastatin	Atorvastatin	129.95			statin[+]		record[+] / statin[+]	record[+] / statin[+]
Sample 301	record[-]	none						statin[-]			record[-] / statin[-]
Sample 302	record[-]	none						statin[-]			record[-] / statin[-]
Sample 303	record[-]	none						statin[-]			record[-] / statin[-]
Sample 304	record[-]	none						statin[-]			record[-] / statin[-]
Sample 305	record[-]	none	Simvastatin Acid	Simvastatin	13.6			statin[+]		record[-] / statin[+]	record[-] / statin[+]
Sample 306	record[-]	none						statin[-]			record[-] / statin[-]
Sample 307	record[-]	none						statin[-]			record[-] / statin[-]
Sample 308	record[-]	none						statin[-]			record[-] / statin[-]
Sample 309	record[-]	none	2-OH-atorvastatin	Atorvastatin	238.266			statin[+]		record[-] / statin[+]	record[-] / statin[+]
Sample 310	record[-]	none						statin[-]			record[-] / statin[-]
Sample 311	record[-]	none						statin[-]			record[-] / statin[-]
Sample 312	record[+]	PRAVASTATIN	Pravastatin	Pravastatin	2.77217			statin[+]		record[+] / statin[+]	record[+] / statin[+]
Sample 313	record[+]	ATORVASTATIN	2-OH-atorvastatin	Atorvastatin	977.874			statin[+]		record[+] / statin[+]	record[+] / statin[+]
Sample 314	record[-]	none						statin[-]			record[-] / statin[-]
Sample 315	record[-]	none						statin[-]			record[-] / statin[-]
Sample 316	record[-]	none						statin[-]			record[-] / statin[-]
Sample 317	record[-]	none	Simvastatin Acid	Simvastatin	12.6991			statin[+]		record[-] / statin[+]	record[-] / statin[+]
Sample 318	record[-]	none	Atorvastatin	Atorvastatin	2.50819			statin[+]		record[-] / statin[+]	record[-] / statin[+]
Sample 319	record[+]	SIMVASTATIN	Simvastatin Acid	Simvastatin	2.92788			statin[+]		record[+] / statin[+]	record[+] / statin[+]
Sample 320	record[-]	none				Gemfibrozil	8067.53	statin[+]	fibrate[+]	record[-] / statin[+]	record[-] / statin[+] / fibrate[+]
Sample 321	record[+]	ATORVASTATIN	2-OH-atorvastatin	Atorvastatin	130.107			statin[+]		record[+] / statin[+]	record[+] / statin[+]
Sample 322	record[-]	none	Simvastatin Acid	Simvastatin	18.3528			statin[+]		record[-] / statin[+]	record[-] / statin[+]
Sample 323	record[+]	ATORVASTATIN	2-OH-atorvastatin	Atorvastatin	261.921			statin[+]		record[+] / statin[+]	record[+] / statin[+]
Sample 324	record[-]	none	Simvastatin Acid	Simvastatin	16.0293			statin[+]		record[-] / statin[+]	record[-] / statin[+]
Sample 325	record[+]	SIMVASTATIN	Simvastatin Acid	Simvastatin	4.11134			statin[+]		record[+] / statin[+]	record[+] / statin[+]
Sample 326	record[-]	none	2-OH-atorvastatin	Atorvastatin	195.416			statin[+]		record[-] / statin[+]	record[-] / statin[+]
Sample 327	record[-]	none						statin[-]			record[-] / statin[-]
Sample 328	record[-]	none						statin[-]			record[-] / statin[-]
Sample 329	record[-]	none						statin[-]			record[-] / statin[-]
Sample 330	record[-]	none	2-OH-atorvastatin	Atorvastatin	288.232			statin[+]		record[-] / statin[+]	record[-] / statin[+]
Sample 331	record[-]	none	Lovastatin acid	Lovastatin acid	2.29014	Fenofibric acid	37066.2	statin[+]		record[-] / statin[+]	record[-] / statin[+]
Sample 332	record[-]	none						statin[-]			record[-] / statin[-]
Sample 333	record[-]	none	2-OH-atorvastatin	Atorvastatin	1565.32			statin[+]		record[-] / statin[+]	record[-] / statin[+]
Sample 334	record[-]	none						statin[-]			record[-] / statin[-]
Sample 335	record[-]	none						statin[-]			record[-] / statin[-]
Sample 336	record[+]	SIMVASTATIN	Simvastatin Acid	Simvastatin	2.12118			statin[+]		record[+] / statin[+]	record[+] / statin[+]
Sample 337	record[+]	ATORVASTATIN	Fluvastatin	Fluvastatin	26.5316			statin[+]		record[+] / statin[+]	record[+] / statin[+]
Sample 338	record[+]	SIMVASTATIN						statin[-]			record[+] / statin[-]
Sample 339	record[+]	SIMVASTATIN	Simvastatin Acid	Simvastatin	4.99737			statin[+]		record[+] / statin[+]	record[+] / statin[+]
Sample 340	record[-]	none						statin[-]			record[-] / statin[-]
Sample 341	record[-]	none	Simvastatin Acid	Simvastatin	8.97702			statin[+]		record[-] / statin[+]	record[-] / statin[+]
Sample 342	record[-]	none						statin[-]			record[-] / statin[-]
Sample 343	record[+]	ATORVASTATIN						statin[-]			record[+] / statin[-]
Sample 344	record[-]	none						statin[-]			record[-] / statin[-]
Sample 345	record[+]	SIMVASTATIN	Simvastatin Acid	Simvastatin	2.26084			statin[+]		record[+] / statin[+]	record[+] / statin[+]
Sample 346	record[+]	ATORVASTATIN	2-OH-atorvastatin	Atorvastatin	252.711			statin[+]		record[+] / statin[+]	record[+] / statin[+]
Sample 347	record[-]	none						statin[-]			record[-] / statin[-]
Sample 348	record[-]	none	2-OH-atorvastatin	Atorvastatin	21.1905			statin[+]		record[-] / statin[+]	record[-] / statin[+]
Sample 349	record[+]	ATORVASTATIN	2-OH-atorvastatin	Atorvastatin	468.07	Gemfibrozil	179.702	statin[+]		record[+] / statin[+]	record[+] / statin[+]
Sample 350	record[-]	none						statin[-]			record[-] / statin[-]
Sample 351	record[-]	none						statin[-]			record[-] / statin[-]
Sample 352	record[+]	ATORVASTATIN				Gemfibrozil	5760.41	statin[+]	fibrate[+]	record[+] / statin[+]	record[+] / statin[+] / fibrate[+]
Sample 353	record[+]	ATORVASTATIN	2-OH-atorvastatin	Atorvastatin	82.82			statin[+]		record[+] / statin[+]	record[+] / statin[+]
Sample 354	record[-]	none						statin[-]			record[-] / statin[-]
Sample 355	record[-]	none	Simvastatin Acid	Simvastatin	22.9251			statin[+]		record[-] / statin[+]	record[-] / statin[+]
Sample 356	record[-]	none						statin[-]			record[-] / statin[-]
Sample 357	record[-]	none	2-OH-atorvastatin	Atorvastatin	313.893			statin[+]		record[-] / statin[+]	record[-] / statin[+]
Sample 358	record[+]	PRAVASTATIN	Pravastatin	Pravastatin	5.77106			statin[+]		record[+] / statin[+]	record[+] / statin[+]
Sample 359	record[+]	SIMVASTATIN	Simvastatin Acid	Simvastatin	5.20192			statin[+]		record[+] / statin[+]	record[+] / statin[+]
Sample 360	record[-]	none						statin[-]			record[-] / statin[-]
Sample 361	record[+]	PRAVASTATIN	Pravastatin	Pravastatin	8.6948			statin[+]		record[+] / statin[+]	record[+] / statin[+]
Sample 362	record[-]	none	2-OH-atorvastatin	Atorvastatin	217.819			statin[+]		record[-] / statin[+]	record[-] / statin[+]
Sample 363	record[-]	none						statin[-]			record[-] / statin[-]
Sample 364	record[-]	none						statin[-]			record[-] / statin[-]
Sample 365	record[-]	none	2-OH-atorvastatin	Atorvastatin	255.209			statin[+]		record[-] / statin[+]	record[-] / statin[+]
Sample 366	record[-]	none						statin[-]			record[-] / statin[-]
Sample 367	record[+]	ATORVASTATIN						statin[-]			record[+] / statin[-]
Sample 368	record[-]	none				Gemfibrozil	479.105	statin[+]	fibrate[+]	record[-] / statin[+]	record[-] / statin[+] / fibrate[+]
Sample 369	record[-]	none						statin[-]			record[-] / statin[-]
Sample 370	record[-]	none						statin[-]			record[-] / statin[-]
Sample 371	record[-]	none						statin[-]			record[-] / statin[-]
Sample 372	record[-]	none						statin[-]			record[-] / statin[-]
Sample 373	record[-]	none						statin[-]			record[-] / statin[-]
Sample 374	record[+]	ATORVASTATIN	Atorvastatin	Atorvastatin	1047.57			statin[+]		record[+] / statin[+]	record[+] / statin[+]
Sample 375	record[+]	SIMVASTATIN						statin[-]			record[+] / statin[-]
Sample 376	record[-]	none				Fenofibric acid	210.744	statin[-]			record[-] / statin[-]
Sample 377	record[+]	ATORVASTATIN						statin[-]			record[+] / statin[-]
Sample 378	record[+]	LOVASTATIN	Lovastatin acid	Lovastatin acid	26.6761			statin[+]		record[+] / statin[+]	record[+] / statin[+]
Sample 379	record[-]	none						statin[-]			record[-] / statin[-]
Sample 380	record[-]	none						statin[-]			record[-] / statin[-]
Sample 381	record[+]	SIMVASTATIN	Simvastatin Acid	Simvastatin	5.90654			statin[+]		record[+] / statin[+]	record[+] / statin[+]
Sample 382	record[-]	none						statin[-]			record[-] / statin[-]
Sample 383	record[+]	SIMVASTATIN						statin[-]			record[+] / statin[-]
Sample 384	record[+]	PRAVASTATIN	Pravastatin	Pravastatin	14.7569			statin[+]		record[+] / statin[+]	record[+] / statin[+]
Sample 385	record[+]	ATORVASTATIN	2-OH-atorvastatin	Atorvastatin	43.1688			statin[+]		record[+] / statin[+]	record[+] / statin[+]
Sample 386	record[-]	none						statin[-]			record[-] / statin[-]
Sample 387	record[+]	ATORVASTATIN	2-OH-atorvastatin	Atorvastatin	25.4237			statin[+]		record[+] / statin[+]	record[+] / statin[+]
Sample 388	record[+]	ATORVASTATIN	2-OH-atorvastatin	Atorvastatin	201.196	Fenofibric acid	6903.84	statin[+]		record[+] / statin[+]	record[+] / statin[+]
Sample 389	record[+]	ATORVASTATIN	2-OH-atorvastatin	Atorvastatin	78.7357			statin[+]		record[+] / statin[+]	record[+] / statin[+]
Sample 390	record[-]	none						statin[-]			record[-] / statin[-]
Sample 391	record[+]	ATORVASTATIN	2-OH-atorvastatin	Atorvastatin	218.195			statin[+]		record[+] / statin[+]	record[+] / statin[+]
Sample 392	record[+]	ATORVASTATIN	2-OH-atorvastatin	Atorvastatin	137.307			statin[+]		record[+] / statin[+]	record[+] / statin[+]
Sample 393	record[+]	FLUVASTATIN	Fluvastatin	Fluvastatin	14.9743			statin[+]		record[+] / statin[+]	record[+] / statin[+]
Sample 394	record[+]	SIMVASTATIN	Simvastatin Acid	Simvastatin	17.7129			statin[+]		record[+] / statin[+]	record[+] / statin[+]
Sample 395	record[+]	PRAVASTATIN	Pravastatin	Pravastatin	8.12111			statin[+]		record[+] / statin[+]	record[+] / statin[+]
Sample 396	record[-]	none	Simvastatin Acid	Simvastatin	2.86879			statin[+]		record[-] / statin[+]	record[-] / statin[+]
Sample 397	record[-]	none	2-OH-atorvastatin	Atorvastatin	880.658			statin[+]		record[-] / statin[+]	record[-] / statin[+]
Sample 398	record[-]	none						statin[-]			record[-] / statin[-]
Sample 399	record[+]	ATORVASTATIN	2-OH-atorvastatin	Atorvastatin	2430.79			statin[+]		record[+] / statin[+]	record[+] / statin[+]
Sample 400	record[-]	none						statin[-]			record[-] / statin[-]
Sample 401	record[-]	none	2-OH-atorvastatin	Atorvastatin	470.339	Fenofibric acid	2997.55	statin[+]		record[-] / statin[+]	record[-] / statin[+]
Sample 402	record[+]	ATORVASTATIN	2-OH-atorvastatin	Atorvastatin	313.641			statin[+]		record[+] / statin[+]	record[+] / statin[+]
Sample 403	record[-]	none	Rosuvastatin	Rosuvastatin	5.84477			statin[+]		record[-] / statin[+]	record[-] / statin[+]
Sample 404	record[-]	none	Simvastatin Acid	Simvastatin	4.19675			statin[+]		record[-] / statin[+]	record[-] / statin[+]
Sample 405	record[-]	none	Simvastatin Acid	Simvastatin	14.0103			statin[+]		record[-] / statin[+]	record[-] / statin[+]
Sample 406	record[-]	none	2-OH-atorvastatin	Atorvastatin	1080.69			statin[+]		record[-] / statin[+]	record[-] / statin[+]
Sample 407	record[-]	none						statin[-]			record[-] / statin[-]
Sample 408	record[-]	none				Gemfibrozil	2380.82	statin[+]	fibrate[+]	record[-] / statin[+]	record[-] / statin[+] / fibrate[+]
Sample 409	record[-]	none	2-OH-atorvastatin	Atorvastatin	1790.43			statin[+]		record[-] / statin[+]	record[-] / statin[+]
Sample 410	record[-]	none	2-OH-atorvastatin	Atorvastatin	40.8807			statin[+]		record[-] / statin[+]	record[-] / statin[+]
Sample 411	record[+]	SIMVASTATIN	Simvastatin Acid	Simvastatin	4.18706			statin[+]		record[+] / statin[+]	record[+] / statin[+]
Sample 412	record[+]	PRAVASTATIN	2-OH-atorvastatin	Atorvastatin	818.426			statin[+]		record[+] / statin[+]	record[+] / statin[+]
Sample 413	record[-]	none						statin[-]			record[-] / statin[-]
Sample 414	record[+]	SIMVASTATIN						statin[-]			record[+] / statin[-]
Sample 415	record[-]	none						statin[-]			record[-] / statin[-]
Sample 416	record[-]	none						statin[-]			record[-] / statin[-]
Sample 417	record[-]	none						statin[-]			record[-] / statin[-]
Sample 418	record[+]	ATORVASTATIN	Atorvastatin	Atorvastatin	51.3407			statin[+]		record[+] / statin[+]	record[+] / statin[+]
Sample 419	record[+]	ATORVASTATIN	2-OH-atorvastatin	Atorvastatin	29.2689			statin[+]		record[+] / statin[+]	record[+] / statin[+]
Sample 420	record[-]	none						statin[-]			record[-] / statin[-]
Sample 421	record[-]	none						statin[-]			record[-] / statin[-]
Sample 422	record[-]	none						statin[-]			record[-] / statin[-]
Sample 423	record[+]	PRAVASTATIN						statin[-]			record[+] / statin[-]
Sample 424	record[-]	none						statin[-]			record[-] / statin[-]
Sample 425	record[-]	none	Simvastatin Acid	Simvastatin	8.98225			statin[+]		record[-] / statin[+]	record[-] / statin[+]
Sample 426	record[-]	none						statin[-]			record[-] / statin[-]
Sample 427	record[-]	none						statin[-]			record[-] / statin[-]
Sample 428	record[-]	none	2-OH-atorvastatin	Atorvastatin	1820.96			statin[+]		record[-] / statin[+]	record[-] / statin[+]
Sample 429	record[-]	none						statin[-]			record[-] / statin[-]
Sample 430	record[+]	ATORVASTATIN	2-OH-atorvastatin	Atorvastatin	474.1			statin[+]		record[+] / statin[+]	record[+] / statin[+]
Sample 431	record[-]	none	Atorvastatin	Atorvastatin	19.6207			statin[+]		record[-] / statin[+]	record[-] / statin[+]
Sample 432	record[+]	ATORVASTATIN	2-OH-atorvastatin	Atorvastatin	744.207			statin[+]		record[+] / statin[+]	record[+] / statin[+]
Sample 433	record[-]	none						statin[-]			record[-] / statin[-]
Sample 434	record[-]	none	Atorvastatin	Atorvastatin	29.5301			statin[+]		record[-] / statin[+]	record[-] / statin[+]
Sample 435	record[-]	none	Atorvastatin	Atorvastatin	504.337			statin[+]		record[-] / statin[+]	record[-] / statin[+]
Sample 436	record[-]	none						statin[-]			record[-] / statin[-]
Sample 437	record[-]	none	2-OH-atorvastatin	Atorvastatin	235.618			statin[+]		record[-] / statin[+]	record[-] / statin[+]
Sample 438	record[-]	none	2-OH-atorvastatin	Atorvastatin	1923.74			statin[+]		record[-] / statin[+]	record[-] / statin[+]
Sample 439	record[+]	SIMVASTATIN						statin[-]			record[+] / statin[-]
Sample 440	record[-]	none						statin[-]			record[-] / statin[-]
Sample 441	record[+]	PRAVASTATIN	Pravastatin	Pravastatin	2.03112			statin[+]		record[+] / statin[+]	record[+] / statin[+]
Sample 442	record[+]	SIMVASTATIN						statin[-]			record[+] / statin[-]
Sample 443	record[-]	none						statin[-]			record[-] / statin[-]
Sample 444	record[-]	none	Simvastatin Acid	Simvastatin	12.7139			statin[+]		record[-] / statin[+]	record[-] / statin[+]
Sample 445	record[+]	SIMVASTATIN	2-OH-atorvastatin	Atorvastatin	9.41127			statin[+]		record[+] / statin[+]	record[+] / statin[+]
Sample 446	record[-]	none	2-OH-atorvastatin	Atorvastatin	302.816			statin[+]		record[-] / statin[+]	record[-] / statin[+]
Sample 447	record[+]	SIMVASTATIN	2-OH-atorvastatin	Atorvastatin	137.01			statin[+]		record[+] / statin[+]	record[+] / statin[+]
Sample 448	record[+]	PRAVASTATIN	Pravastatin	Pravastatin	2.63337			statin[+]		record[+] / statin[+]	record[+] / statin[+]
Sample 449	record[-]	none						statin[-]			record[-] / statin[-]
Sample 450	record[-]	none						statin[-]			record[-] / statin[-]
Sample 451	record[-]	none	Atorvastatin	Atorvastatin	31.23			statin[+]		record[-] / statin[+]	record[-] / statin[+]
Sample 452	record[+]	ATORVASTATIN	2-OH-atorvastatin	Atorvastatin	104.83			statin[+]		record[+] / statin[+]	record[+] / statin[+]
Sample 453	record[+]	LOVASTATIN	Lovastatin acid	Lovastatin acid	17.4478			statin[+]		record[+] / statin[+]	record[+] / statin[+]
Sample 454	record[+]	ATORVASTATIN	Atorvastatin	Atorvastatin	379.699			statin[+]		record[+] / statin[+]	record[+] / statin[+]
Sample 455	record[+]	ATORVASTATIN	2-OH-atorvastatin	Atorvastatin	42.7867			statin[+]		record[+] / statin[+]	record[+] / statin[+]
Sample 456	record[-]	none						statin[-]			record[-] / statin[-]
Sample 457	record[-]	none						statin[-]			record[-] / statin[-]
Sample 458	record[-]	none						statin[-]			record[-] / statin[-]
Sample 459	record[+]	ATORVASTATIN	Atorvastatin	Atorvastatin	34.5161			statin[+]		record[+] / statin[+]	record[+] / statin[+]
Sample 460	record[+]	ATORVASTATIN	2-OH-atorvastatin	Atorvastatin	111.567			statin[+]		record[+] / statin[+]	record[+] / statin[+]
Sample 461	record[-]	none	Rosuvastatin	Rosuvastatin	32.0859			statin[+]		record[-] / statin[+]	record[-] / statin[+]
Sample 462	record[-]	none	Rosuvastatin	Rosuvastatin	17.2862			statin[+]		record[-] / statin[+]	record[-] / statin[+]
Sample 463	record[-]	none						statin[-]			record[-] / statin[-]
Sample 464	record[-]	none	Rosuvastatin	Rosuvastatin	35.4712			statin[+]		record[-] / statin[+]	record[-] / statin[+]
Sample 465	record[-]	none						statin[-]			record[-] / statin[-]
Sample 466	record[-]	none	2-OH-atorvastatin	Atorvastatin	2308.08			statin[+]		record[-] / statin[+]	record[-] / statin[+]
Sample 467	record[+]	ATORVASTATIN	2-OH-atorvastatin	Atorvastatin	471.697			statin[+]		record[+] / statin[+]	record[+] / statin[+]
Sample 468	record[+]	PRAVASTATIN						statin[-]			record[+] / statin[-]
Sample 469	record[-]	none	2-OH-atorvastatin	Atorvastatin	3.64908	Fenofibric acid	3631.23	statin[+]		record[-] / statin[+]	record[-] / statin[+]
Sample 470	record[+]	PRAVASTATIN	Simvastatin Acid	Simvastatin	12.8229			statin[+]		record[+] / statin[+]	record[+] / statin[+]
Sample 471	record[-]	none	Simvastatin Acid	Simvastatin	19.0038			statin[+]		record[-] / statin[+]	record[-] / statin[+]
Sample 472	record[-]	none						statin[-]			record[-] / statin[-]
Sample 473	record[+]	ATORVASTATIN	2-OH-atorvastatin	Atorvastatin	82.73			statin[+]		record[+] / statin[+]	record[+] / statin[+]
Sample 474	record[-]	none	2-OH-atorvastatin	Atorvastatin	646.791			statin[+]		record[-] / statin[+]	record[-] / statin[+]
Sample 475	record[-]	none	Lovastatin acid	Lovastatin acid	2.56644			statin[+]		record[-] / statin[+]	record[-] / statin[+]
Sample 476	record[+]	PRAVASTATIN						statin[-]			record[+] / statin[-]
Sample 477	record[+]	ATORVASTATIN	2-OH-atorvastatin	Atorvastatin	45.2204			statin[+]		record[+] / statin[+]	record[+] / statin[+]
Sample 478	record[-]	none	2-OH-atorvastatin	Atorvastatin	352.133			statin[+]		record[-] / statin[+]	record[-] / statin[+]
Sample 479	record[-]	none	2-OH-atorvastatin	Atorvastatin	191.477			statin[+]		record[-] / statin[+]	record[-] / statin[+]
Sample 480	record[+]	ATORVASTATIN	2-OH-atorvastatin	Atorvastatin	261.876			statin[+]		record[+] / statin[+]	record[+] / statin[+]
Sample 481	record[-]	none						statin[-]			record[-] / statin[-]
Sample 482	record[+]	ATORVASTATIN	2-OH-atorvastatin	Atorvastatin	64.1961			statin[+]		record[+] / statin[+]	record[+] / statin[+]
Sample 483	record[+]	SIMVASTATIN	Simvastatin Acid	Simvastatin	7.21511			statin[+]		record[+] / statin[+]	record[+] / statin[+]
Sample 484	record[-]	none						statin[-]			record[-] / statin[-]
Sample 485	record[-]	none						statin[-]			record[-] / statin[-]
Sample 486	record[-]	none						statin[-]			record[-] / statin[-]
Sample 487	record[-]	none						statin[-]			record[-] / statin[-]
Sample 488	record[+]	ATORVASTATIN	2-OH-atorvastatin	Atorvastatin	2179.86			statin[+]		record[+] / statin[+]	record[+] / statin[+]
Sample 489	record[-]	none						statin[-]			record[-] / statin[-]
Sample 490	record[-]	none	Fluvastatin	Fluvastatin	21.6204			statin[+]		record[-] / statin[+]	record[-] / statin[+]
Sample 491	record[-]	none	2-OH-atorvastatin	Atorvastatin	1032.09			statin[+]		record[-] / statin[+]	record[-] / statin[+]
Sample 492	record[-]	none						statin[-]			record[-] / statin[-]
Sample 493	record[+]	ATORVASTATIN	2-OH-atorvastatin	Atorvastatin	95.7583			statin[+]		record[+] / statin[+]	record[+] / statin[+]
Sample 494	record[-]	none						statin[-]			record[-] / statin[-]
Sample 495	record[-]	none	Simvastatin Acid	Simvastatin	9.79835			statin[+]		record[-] / statin[+]	record[-] / statin[+]
Sample 496	record[+]	ATORVASTATIN	2-OH-atorvastatin	Atorvastatin	6.77715			statin[+]		record[+] / statin[+]	record[+] / statin[+]
Sample 497	record[+]	ATORVASTATIN	Atorvastatin	Atorvastatin	50.6354			statin[+]		record[+] / statin[+]	record[+] / statin[+]
Sample 498	record[-]	none	2-OH-atorvastatin	Atorvastatin	130.804			statin[+]		record[-] / statin[+]	record[-] / statin[+]
Sample 499	record[+]	ATORVASTATIN	2-OH-atorvastatin	Atorvastatin	330.718			statin[+]		record[+] / statin[+]	record[+] / statin[+]
Sample 500	record[-]	none				Gemfibrozil	1121.32	statin[+]	fibrate[+]	record[-] / statin[+]	record[-] / statin[+] / fibrate[+]
Sample 501	record[-]	none	Atorvastatin	Atorvastatin	116.209			statin[+]		record[-] / statin[+]	record[-] / statin[+]
Sample 502	record[-]	none	2-OH-atorvastatin	Atorvastatin	74.4774			statin[+]		record[-] / statin[+]	record[-] / statin[+]
Sample 503	record[-]	none						statin[-]			record[-] / statin[-]
Sample 504	record[-]	none						statin[-]			record[-] / statin[-]
Sample 505	record[-]	none						statin[-]			record[-] / statin[-]
Sample 506	record[+]	PRAVASTATIN	Pravastatin	Pravastatin	2.81707			statin[+]		record[+] / statin[+]	record[+] / statin[+]
Sample 507	record[-]	none						statin[-]			record[-] / statin[-]
Sample 508	record[-]	none	2-OH-atorvastatin	Atorvastatin	64.8577			statin[+]		record[-] / statin[+]	record[-] / statin[+]
Sample 509	record[-]	none						statin[-]			record[-] / statin[-]
Sample 510	record[-]	none						statin[-]			record[-] / statin[-]
Sample 511	record[+]	ATORVASTATIN	2-OH-atorvastatin	Atorvastatin	63.6341			statin[+]		record[+] / statin[+]	record[+] / statin[+]
Sample 512	record[-]	none	2-OH-atorvastatin	Atorvastatin	83.999			statin[+]		record[-] / statin[+]	record[-] / statin[+]
Sample 513	record[-]	none						statin[-]			record[-] / statin[-]
Sample 514	record[+]	ATORVASTATIN				Gemfibrozil	11703.6	statin[+]	fibrate[+]	record[+] / statin[+]	record[+] / statin[+] / fibrate[+]
Sample 515	record[-]	none	2-OH-atorvastatin	Atorvastatin	499.362			statin[+]		record[-] / statin[+]	record[-] / statin[+]
Sample 516	record[-]	none						statin[-]			record[-] / statin[-]
Sample 517	record[-]	none						statin[-]			record[-] / statin[-]
Sample 518	record[-]	none						statin[-]			record[-] / statin[-]
Sample 519	record[-]	none	2-OH-atorvastatin	Atorvastatin	391.592			statin[+]		record[-] / statin[+]	record[-] / statin[+]
Sample 520	record[-]	none						statin[-]			record[-] / statin[-]
Sample 521	record[+]	SIMVASTATIN	Simvastatin Acid	Simvastatin	6.81432			statin[+]		record[+] / statin[+]	record[+] / statin[+]
Sample 522	record[-]	none						statin[-]			record[-] / statin[-]
Sample 523	record[+]	ATORVASTATIN						statin[-]			record[+] / statin[-]
Sample 524	record[-]	none	Simvastatin Acid	Simvastatin	8.28176			statin[+]		record[-] / statin[+]	record[-] / statin[+]
Sample 525	record[-]	none	2-OH-atorvastatin	Atorvastatin	156.63			statin[+]		record[-] / statin[+]	record[-] / statin[+]
Sample 526	record[+]	SIMVASTATIN	Simvastatin Acid	Simvastatin	15.6524			statin[+]		record[+] / statin[+]	record[+] / statin[+]
Sample 527	record[-]	none						statin[-]			record[-] / statin[-]
Sample 528	record[-]	none						statin[-]			record[-] / statin[-]
Sample 529	record[-]	none						statin[-]			record[-] / statin[-]
Sample 530	record[+]	ATORVASTATIN						statin[-]			record[+] / statin[-]
Sample 531	record[-]	none	2-OH-atorvastatin	Atorvastatin	81.2342			statin[+]		record[-] / statin[+]	record[-] / statin[+]
Sample 532	record[+]	SIMVASTATIN	Simvastatin Acid	Simvastatin	2.93724			statin[+]		record[+] / statin[+]	record[+] / statin[+]
Sample 533	record[-]	none						statin[-]			record[-] / statin[-]
Sample 534	record[+]	SIMVASTATIN	Simvastatin Acid	Simvastatin	3.67645			statin[+]		record[+] / statin[+]	record[+] / statin[+]
Sample 535	record[-]	none	2-OH-atorvastatin	Atorvastatin	132.802			statin[+]		record[-] / statin[+]	record[-] / statin[+]
Sample 536	record[-]	none						statin[-]			record[-] / statin[-]
Sample 537	record[-]	none						statin[-]			record[-] / statin[-]
Sample 538	record[-]	none	Simvastatin Acid	Simvastatin	36.6122	Fenofibric acid	536.04	statin[+]		record[-] / statin[+]	record[-] / statin[+]
Sample 539	record[-]	none						statin[-]			record[-] / statin[-]
Sample 540	record[-]	none				Fenofibric acid	54660.3	statin[-]			record[-] / statin[-]
Sample 541	record[-]	none	2-OH-atorvastatin	Atorvastatin	23.7611			statin[+]		record[-] / statin[+]	record[-] / statin[+]
Sample 542	record[-]	none						statin[-]			record[-] / statin[-]
Sample 543	record[-]	none						statin[-]			record[-] / statin[-]
Sample 544	record[+]	ROSUVASTATIN	Rosuvastatin	Rosuvastatin	9.19877			statin[+]		record[+] / statin[+]	record[+] / statin[+]
Sample 545	record[-]	none						statin[-]			record[-] / statin[-]
Sample 546	record[-]	none	Simvastatin Acid	Simvastatin	3.98389	Fenofibric acid	127.045	statin[+]		record[-] / statin[+]	record[-] / statin[+]
Sample 547	record[-]	none						statin[-]			record[-] / statin[-]
Sample 548	record[-]	none	2-OH-atorvastatin	Atorvastatin	164.182			statin[+]		record[-] / statin[+]	record[-] / statin[+]
Sample 549	record[-]	none	2-OH-atorvastatin	Atorvastatin	53.8707			statin[+]		record[-] / statin[+]	record[-] / statin[+]
Sample 550	record[+]	ATORVASTATIN	2-OH-atorvastatin	Atorvastatin	18.2892			statin[+]		record[+] / statin[+]	record[+] / statin[+]
Sample 551	record[-]	none						statin[-]			record[-] / statin[-]
Sample 552	record[-]	none	2-OH-atorvastatin	Atorvastatin	88.2809			statin[+]		record[-] / statin[+]	record[-] / statin[+]
Sample 553	record[-]	none						statin[-]			record[-] / statin[-]
Sample 554	record[+]	SIMVASTATIN						statin[-]			record[+] / statin[-]
Sample 555	record[+]	ATORVASTATIN	2-OH-atorvastatin	Atorvastatin	685.75			statin[+]		record[+] / statin[+]	record[+] / statin[+]
Sample 556	record[-]	none						statin[-]			record[-] / statin[-]
Sample 557	record[-]	none				Gemfibrozil	4684.32	statin[+]	fibrate[+]	record[-] / statin[+]	record[-] / statin[+] / fibrate[+]
Sample 558	record[-]	none	2-OH-atorvastatin	Atorvastatin	493.808			statin[+]		record[-] / statin[+]	record[-] / statin[+]
Sample 559	record[+]	ATORVASTATIN				Fenofibric acid	34495.3	statin[-]			record[+] / statin[-]
Sample 560	record[+]	ATORVASTATIN	2-OH-atorvastatin	Atorvastatin	174.686			statin[+]		record[+] / statin[+]	record[+] / statin[+]
Sample 561	record[+]	ATORVASTATIN	2-OH-atorvastatin	Atorvastatin	190.4			statin[+]		record[+] / statin[+]	record[+] / statin[+]
Sample 562	record[-]	none						statin[-]			record[-] / statin[-]
Sample 563	record[-]	none	Rosuvastatin	Rosuvastatin	9.50243			statin[+]		record[-] / statin[+]	record[-] / statin[+]
Sample 564	record[-]	none	2-OH-atorvastatin	Atorvastatin	133.334			statin[+]		record[-] / statin[+]	record[-] / statin[+]
Sample 565	record[-]	none						statin[-]			record[-] / statin[-]
Sample 566	record[-]	none						statin[-]			record[-] / statin[-]
Sample 567	record[-]	none						statin[-]			record[-] / statin[-]
Sample 568	record[+]	ATORVASTATIN	2-OH-atorvastatin	Atorvastatin	6.19967			statin[+]		record[+] / statin[+]	record[+] / statin[+]
Sample 569	record[+]	ROSUVASTATIN						statin[-]			record[+] / statin[-]
Sample 570	record[-]	none						statin[-]			record[-] / statin[-]
Sample 571	record[-]	none						statin[-]			record[-] / statin[-]
Sample 572	record[-]	none				Gemfibrozil	3146.43	statin[+]	fibrate[+]	record[-] / statin[+]	record[-] / statin[+] / fibrate[+]
Sample 573	record[-]	none	Simvastatin Acid	Simvastatin	5.50678			statin[+]		record[-] / statin[+]	record[-] / statin[+]
Sample 574	record[-]	none						statin[-]			record[-] / statin[-]
Sample 575	record[-]	none	Simvastatin Acid	Simvastatin	8.09666	Fenofibric acid	424.253	statin[+]		record[-] / statin[+]	record[-] / statin[+]
Sample 576	record[-]	none	Simvastatin Acid	Simvastatin	7.3591			statin[+]		record[-] / statin[+]	record[-] / statin[+]
Sample 577	record[-]	none						statin[-]			record[-] / statin[-]
Sample 578	record[-]	none						statin[-]			record[-] / statin[-]
Sample 579	record[-]	none						statin[-]			record[-] / statin[-]
Sample 580	record[+]	PRAVASTATIN				Gemfibrozil	211.081	statin[+]	fibrate[+]	record[+] / statin[+]	record[+] / statin[+] / fibrate[+]
Sample 581	record[+]	SIMVASTATIN						statin[-]			record[+] / statin[-]
Sample 582	record[-]	none						statin[-]			record[-] / statin[-]
Sample 583	record[-]	none						statin[-]			record[-] / statin[-]
Sample 584	record[-]	none	2-OH-atorvastatin	Atorvastatin	48.6148			statin[+]		record[-] / statin[+]	record[-] / statin[+]
Sample 585	record[-]	none	2-OH-atorvastatin	Atorvastatin	44.9363	Fenofibric acid	26945.8	statin[+]		record[-] / statin[+]	record[-] / statin[+]
Sample 586	record[-]	none						statin[-]			record[-] / statin[-]
Sample 587	record[-]	none	2-OH-atorvastatin	Atorvastatin	51.8885			statin[+]		record[-] / statin[+]	record[-] / statin[+]
Sample 588	record[+]	ATORVASTATIN	2-OH-atorvastatin	Atorvastatin	152.118			statin[+]		record[+] / statin[+]	record[+] / statin[+]
Sample 589	record[+]	PRAVASTATIN						statin[-]			record[+] / statin[-]
Sample 590	record[+]	LOVASTATIN	2-OH-atorvastatin	Atorvastatin	602.401			statin[+]		record[+] / statin[+]	record[+] / statin[+]
Sample 591	record[-]	none	2-OH-atorvastatin	Atorvastatin	152.143			statin[+]		record[-] / statin[+]	record[-] / statin[+]
Sample 592	record[+]	ATORVASTATIN	2-OH-atorvastatin	Atorvastatin	108.546			statin[+]		record[+] / statin[+]	record[+] / statin[+]
Sample 593	record[+]	PRAVASTATIN						statin[-]			record[+] / statin[-]
Sample 594	record[-]	none	2-OH-atorvastatin	Atorvastatin	371.647			statin[+]		record[-] / statin[+]	record[-] / statin[+]
Sample 595	record[-]	none						statin[-]			record[-] / statin[-]
Sample 596	record[-]	none						statin[-]			record[-] / statin[-]
Sample 597	record[+]	SIMVASTATIN						statin[-]			record[+] / statin[-]
Sample 598	record[-]	none	2-OH-atorvastatin	Atorvastatin	601.362			statin[+]		record[-] / statin[+]	record[-] / statin[+]
Sample 599	record[-]	none	2-OH-atorvastatin	Atorvastatin	1595.03			statin[+]		record[-] / statin[+]	record[-] / statin[+]
Sample 600	record[-]	none						statin[-]			record[-] / statin[-]
Sample 601	record[-]	none						statin[-]			record[-] / statin[-]
Sample 602	record[+]	ATORVASTATIN						statin[-]			record[+] / statin[-]
Sample 603	record[-]	none	Atorvastatin	Atorvastatin	201.607			statin[+]		record[-] / statin[+]	record[-] / statin[+]
Sample 604	record[-]	none						statin[-]			record[-] / statin[-]
Sample 605	record[-]	none	2-OH-atorvastatin	Atorvastatin	242.466			statin[+]		record[-] / statin[+]	record[-] / statin[+]
Sample 606	record[-]	none	2-OH-atorvastatin	Atorvastatin	104.859			statin[+]		record[-] / statin[+]	record[-] / statin[+]
Sample 607	record[-]	none						statin[-]			record[-] / statin[-]
Sample 608	record[-]	none						statin[-]			record[-] / statin[-]
Sample 609	record[-]	none	2-OH-atorvastatin	Atorvastatin	229.026			statin[+]		record[-] / statin[+]	record[-] / statin[+]
Sample 610	record[+]	PRAVASTATIN	Pravastatin	Pravastatin	16.5687			statin[+]		record[+] / statin[+]	record[+] / statin[+]
Sample 611	record[-]	none	2-OH-atorvastatin	Atorvastatin	139.482			statin[+]		record[-] / statin[+]	record[-] / statin[+]
Sample 612	record[-]	none						statin[-]			record[-] / statin[-]
Sample 613	record[-]	none	Rosuvastatin	Rosuvastatin	3.39868			statin[+]		record[-] / statin[+]	record[-] / statin[+]
Sample 614	record[-]	none						statin[-]			record[-] / statin[-]
Sample 615	record[-]	none						statin[-]			record[-] / statin[-]
Sample 616	record[-]	none	Atorvastatin	Atorvastatin	206.397			statin[+]		record[-] / statin[+]	record[-] / statin[+]
Sample 617	record[-]	none						statin[-]			record[-] / statin[-]
Sample 618	record[-]	none	Atorvastatin	Atorvastatin	458.735	Gemfibrozil	152.499	statin[+]		record[-] / statin[+]	record[-] / statin[+]
Sample 619	record[-]	none	Atorvastatin	Atorvastatin	271.908	Gemfibrozil	108.744	statin[+]		record[-] / statin[+]	record[-] / statin[+]
Sample 620	record[-]	none	2-OH-atorvastatin	Atorvastatin	419.554			statin[+]		record[-] / statin[+]	record[-] / statin[+]
Sample 621	record[-]	none				Fenofibric acid	381.854	statin[-]			record[-] / statin[-]
Sample 622	record[-]	none						statin[-]			record[-] / statin[-]
Sample 623	record[-]	none	2-OH-atorvastatin	Atorvastatin	136.357	Gemfibrozil	69.7344	statin[+]		record[-] / statin[+]	record[-] / statin[+]
Sample 624	record[+]	ATORVASTATIN						statin[-]			record[+] / statin[-]
Sample 625	record[+]	SIMVASTATIN	Simvastatin Acid	Simvastatin	2.41368			statin[+]		record[+] / statin[+]	record[+] / statin[+]
Sample 626	record[+]	ATORVASTATIN	2-OH-atorvastatin	Atorvastatin	118.355			statin[+]		record[+] / statin[+]	record[+] / statin[+]
Sample 627	record[+]	SIMVASTATIN	Simvastatin Acid	Simvastatin	2.44665			statin[+]		record[+] / statin[+]	record[+] / statin[+]
Sample 628	record[+]	SIMVASTATIN						statin[-]			record[+] / statin[-]
Sample 629	record[-]	none	2-OH-atorvastatin	Atorvastatin	64.6439			statin[+]		record[-] / statin[+]	record[-] / statin[+]
Sample 630	record[+]	SIMVASTATIN	Simvastatin Acid	Simvastatin	10.0748			statin[+]		record[+] / statin[+]	record[+] / statin[+]
Sample 631	record[-]	none				Gemfibrozil	91.7247	statin[+]	fibrate[+]	record[-] / statin[+]	record[-] / statin[+] / fibrate[+]
Sample 632	record[+]	SIMVASTATIN	Simvastatin Acid	Simvastatin	4.58106			statin[+]		record[+] / statin[+]	record[+] / statin[+]
Sample 633	record[-]	none						statin[-]			record[-] / statin[-]
Sample 634	record[-]	none	2-OH-atorvastatin	Atorvastatin	129.778			statin[+]		record[-] / statin[+]	record[-] / statin[+]
Sample 635	record[-]	none						statin[-]			record[-] / statin[-]
Sample 636	record[+]	ATORVASTATIN	2-OH-atorvastatin	Atorvastatin	141.318			statin[+]		record[+] / statin[+]	record[+] / statin[+]
Sample 637	record[+]	ATORVASTATIN	2-OH-atorvastatin	Atorvastatin	127.797			statin[+]		record[+] / statin[+]	record[+] / statin[+]
Sample 638	record[+]	ATORVASTATIN	2-OH-atorvastatin	Atorvastatin	68.5505			statin[+]		record[+] / statin[+]	record[+] / statin[+]
Sample 639	record[-]	none	2-OH-atorvastatin	Atorvastatin	407.556			statin[+]		record[-] / statin[+]	record[-] / statin[+]
Sample 640	record[-]	none						statin[-]			record[-] / statin[-]
Sample 641	record[+]	ATORVASTATIN	2-OH-atorvastatin	Atorvastatin	246.911			statin[+]		record[+] / statin[+]	record[+] / statin[+]
Sample 642	record[-]	none						statin[-]			record[-] / statin[-]
Sample 643	record[-]	none						statin[-]			record[-] / statin[-]
Sample 644	record[+]	SIMVASTATIN/EZE	Simvastatin Acid	Simvastatin	5.64574			statin[+]		record[+] / statin[+]	record[+] / statin[+]
Sample 645	record[-]	none						statin[-]			record[-] / statin[-]
Sample 646	record[-]	none						statin[-]			record[-] / statin[-]
Sample 647	record[-]	none	2-OH-atorvastatin	Atorvastatin	111.776			statin[+]		record[-] / statin[+]	record[-] / statin[+]
Sample 648	record[-]	none						statin[-]			record[-] / statin[-]
Sample 649	record[+]	ATORVASTATIN	2-OH-atorvastatin	Atorvastatin	200.628			statin[+]		record[+] / statin[+]	record[+] / statin[+]
Sample 650	record[-]	none						statin[-]			record[-] / statin[-]
Sample 651	record[-]	none						statin[-]			record[-] / statin[-]
Sample 652	record[-]	none						statin[-]			record[-] / statin[-]
Sample 653	record[-]	none						statin[-]			record[-] / statin[-]
Sample 654	record[+]	SIMVASTATIN	Simvastatin Acid	Simvastatin	5.71737			statin[+]		record[+] / statin[+]	record[+] / statin[+]
Sample 655	record[-]	none	2-OH-atorvastatin	Atorvastatin	248.503			statin[+]		record[-] / statin[+]	record[-] / statin[+]
Sample 656	record[+]	ATORVASTATIN	2-OH-atorvastatin	Atorvastatin	52.9779			statin[+]		record[+] / statin[+]	record[+] / statin[+]
Sample 657	record[-]	none	2-OH-atorvastatin	Atorvastatin	321.61			statin[+]		record[-] / statin[+]	record[-] / statin[+]
Sample 658	record[-]	none	2-OH-atorvastatin	Atorvastatin	378.327			statin[+]		record[-] / statin[+]	record[-] / statin[+]
Sample 659	record[-]	none				Gemfibrozil	4095.57	statin[+]	fibrate[+]	record[-] / statin[+]	record[-] / statin[+] / fibrate[+]
Sample 660	record[-]	none						statin[-]			record[-] / statin[-]
Sample 661	record[-]	none						statin[-]			record[-] / statin[-]
Sample 662	record[-]	none	Simvastatin Acid	Simvastatin	2.69819			statin[+]		record[-] / statin[+]	record[-] / statin[+]
Sample 663	record[+]	ATORVASTATIN	2-OH-atorvastatin	Atorvastatin	186.459			statin[+]		record[+] / statin[+]	record[+] / statin[+]
Sample 664	record[-]	none						statin[-]			record[-] / statin[-]
Sample 665	record[+]	SIMVASTATIN	2-OH-atorvastatin	Atorvastatin	211.864			statin[+]		record[+] / statin[+]	record[+] / statin[+]
Sample 666	record[-]	none						statin[-]			record[-] / statin[-]
Sample 667	record[-]	none						statin[-]			record[-] / statin[-]
Sample 668	record[-]	none						statin[-]			record[-] / statin[-]
Sample 669	record[-]	none						statin[-]			record[-] / statin[-]
Sample 670	record[-]	none						statin[-]			record[-] / statin[-]
Sample 671	record[+]	ATORVASTATIN	2-OH-atorvastatin	Atorvastatin	68.0708			statin[+]		record[+] / statin[+]	record[+] / statin[+]
Sample 672	record[+]	ATORVASTATIN	Atorvastatin	Atorvastatin	61.9275			statin[+]		record[+] / statin[+]	record[+] / statin[+]
Sample 673	record[-]	none	2-OH-atorvastatin	Atorvastatin	14.9494			statin[+]		record[-] / statin[+]	record[-] / statin[+]
Sample 674	record[-]	none	Pravastatin	Pravastatin	2.50314			statin[+]		record[-] / statin[+]	record[-] / statin[+]
Sample 675	record[+]	ATORVASTATIN						statin[-]			record[+] / statin[-]
Sample 676	record[+]	ATORVASTATIN						statin[-]			record[+] / statin[-]
Sample 677	record[+]	SIMVASTATIN	Simvastatin Acid	Simvastatin	13.0448			statin[+]		record[+] / statin[+]	record[+] / statin[+]
Sample 678	record[-]	none	2-OH-atorvastatin	Atorvastatin	37.1679			statin[+]		record[-] / statin[+]	record[-] / statin[+]
Sample 679	record[+]	ATORVASTATIN	2-OH-atorvastatin	Atorvastatin	150.071			statin[+]		record[+] / statin[+]	record[+] / statin[+]
Sample 680	record[+]	ATORVASTATIN	2-OH-atorvastatin	Atorvastatin	147.776			statin[+]		record[+] / statin[+]	record[+] / statin[+]
Sample 681	record[-]	none						statin[-]			record[-] / statin[-]
Sample 682	record[-]	none	Simvastatin Acid	Simvastatin	17.1553			statin[+]		record[-] / statin[+]	record[-] / statin[+]
Sample 683	record[-]	none	2-OH-atorvastatin	Atorvastatin	6.10921			statin[+]		record[-] / statin[+]	record[-] / statin[+]
Sample 684	record[-]	none						statin[-]			record[-] / statin[-]
Sample 685	record[+]	SIMVASTATIN	Simvastatin Acid	Simvastatin	55.4429			statin[+]		record[+] / statin[+]	record[+] / statin[+]
Sample 686	record[+]	ATORVASTATIN	2-OH-atorvastatin	Atorvastatin	1228.13			statin[+]		record[+] / statin[+]	record[+] / statin[+]
Sample 687	record[+]	ATORVASTATIN	2-OH-atorvastatin	Atorvastatin	151.393			statin[+]		record[+] / statin[+]	record[+] / statin[+]
Sample 688	record[-]	none						statin[-]			record[-] / statin[-]
Sample 689	record[-]	none	2-OH-atorvastatin	Atorvastatin	1513.29			statin[+]		record[-] / statin[+]	record[-] / statin[+]
Sample 690	record[-]	none	2-OH-atorvastatin	Atorvastatin	13.7484			statin[+]		record[-] / statin[+]	record[-] / statin[+]
Sample 691	record[-]	none	2-OH-atorvastatin	Atorvastatin	211.882			statin[+]		record[-] / statin[+]	record[-] / statin[+]
Sample 692	record[+]	SIMVASTATIN						statin[-]			record[+] / statin[-]
Sample 693	record[+]	SIMVASTATIN						statin[-]			record[+] / statin[-]
Sample 694	record[-]	none	2-OH-atorvastatin	Atorvastatin	238.027			statin[+]		record[-] / statin[+]	record[-] / statin[+]
Sample 695	record[+]	SIMVASTATIN						statin[-]			record[+] / statin[-]
Sample 696	record[-]	none				Fenofibric acid	20659.8	statin[-]			record[-] / statin[-]
Sample 697	record[-]	none						statin[-]			record[-] / statin[-]
Sample 698	record[-]	none	Atorvastatin	Atorvastatin	2.20472			statin[+]		record[-] / statin[+]	record[-] / statin[+]
Sample 699	record[-]	none						statin[-]			record[-] / statin[-]
Sample 700	record[-]	none				Gemfibrozil	4017.82	statin[+]	fibrate[+]	record[-] / statin[+]	record[-] / statin[+] / fibrate[+]
Sample 701	record[-]	none	Atorvastatin	Atorvastatin	321.264			statin[+]		record[-] / statin[+]	record[-] / statin[+]
Sample 702	record[-]	none	2-OH-atorvastatin	Atorvastatin	129.2			statin[+]		record[-] / statin[+]	record[-] / statin[+]
Sample 703	record[-]	none						statin[-]			record[-] / statin[-]
Sample 704	record[-]	none						statin[-]			record[-] / statin[-]
Sample 705	record[+]	SIMVASTATIN						statin[-]			record[+] / statin[-]
Sample 706	record[+]	ATORVASTATIN	2-OH-atorvastatin	Atorvastatin	5.32404			statin[+]		record[+] / statin[+]	record[+] / statin[+]
Sample 707	record[-]	none	Atorvastatin	Atorvastatin	1198.58			statin[+]		record[-] / statin[+]	record[-] / statin[+]
Sample 708	record[+]	SIMVASTATIN						statin[-]			record[+] / statin[-]
Sample 709	record[+]	LOVASTATIN	Lovastatin acid	Lovastatin acid	22.4534			statin[+]		record[+] / statin[+]	record[+] / statin[+]
Sample 710	record[-]	none	2-OH-atorvastatin	Atorvastatin	897.547			statin[+]		record[-] / statin[+]	record[-] / statin[+]
Sample 711	record[+]	SIMVASTATIN	Simvastatin Acid	Simvastatin	7.37919			statin[+]		record[+] / statin[+]	record[+] / statin[+]
Sample 712	record[+]	ATORVASTATIN	2-OH-atorvastatin	Atorvastatin	231.906			statin[+]		record[+] / statin[+]	record[+] / statin[+]
Sample 713	record[+]	SIMVASTATIN						statin[-]			record[+] / statin[-]
Sample 714	record[+]	ATORVASTATIN	2-OH-atorvastatin	Atorvastatin	39.8689			statin[+]		record[+] / statin[+]	record[+] / statin[+]
Sample 715	record[-]	none	Simvastatin Acid	Simvastatin	12.2264			statin[+]		record[-] / statin[+]	record[-] / statin[+]
Sample 716	record[-]	none				Gemfibrozil	2599.87	statin[+]	fibrate[+]	record[-] / statin[+]	record[-] / statin[+] / fibrate[+]
Sample 717	record[-]	none				Gemfibrozil	2133.92	statin[+]	fibrate[+]	record[-] / statin[+]	record[-] / statin[+] / fibrate[+]
Sample 718	record[-]	none	2-OH-atorvastatin	Atorvastatin	470.341			statin[+]		record[-] / statin[+]	record[-] / statin[+]
Sample 719	record[-]	none	Simvastatin Acid	Simvastatin	5.44364			statin[+]		record[-] / statin[+]	record[-] / statin[+]
Sample 720	record[+]	SIMVASTATIN				Gemfibrozil	420.435	statin[+]	fibrate[+]	record[+] / statin[+]	record[+] / statin[+] / fibrate[+]
Sample 721	record[-]	none						statin[-]			record[-] / statin[-]
Sample 722	record[+]	SIMVASTATIN	Simvastatin Acid	Simvastatin	3.61414			statin[+]		record[+] / statin[+]	record[+] / statin[+]
Sample 723	record[-]	none	Pravastatin	Pravastatin	14.8773			statin[+]		record[-] / statin[+]	record[-] / statin[+]
Sample 724	record[-]	none	2-OH-atorvastatin	Atorvastatin	214.109			statin[+]		record[-] / statin[+]	record[-] / statin[+]
Sample 725	record[+]	SIMVASTATIN	Simvastatin Acid	Simvastatin	2.55495			statin[+]		record[+] / statin[+]	record[+] / statin[+]
Sample 726	record[+]	ATORVASTATIN	2-OH-atorvastatin	Atorvastatin	53.4243			statin[+]		record[+] / statin[+]	record[+] / statin[+]
Sample 727	record[-]	none						statin[-]			record[-] / statin[-]
Sample 728	record[+]	PRAVASTATIN	Pravastatin	Pravastatin	31.2023			statin[+]		record[+] / statin[+]	record[+] / statin[+]
Sample 729	record[+]	ATORVASTATIN	2-OH-atorvastatin	Atorvastatin	63.3137			statin[+]		record[+] / statin[+]	record[+] / statin[+]
Sample 730	record[+]	SIMVASTATIN						statin[-]			record[+] / statin[-]
Sample 731	record[+]	SIMVASTATIN	Atorvastatin	Atorvastatin	16.2406			statin[+]		record[+] / statin[+]	record[+] / statin[+]
Sample 732	record[+]	SIMVASTATIN	Atorvastatin	Atorvastatin	10.9043			statin[+]		record[+] / statin[+]	record[+] / statin[+]
Sample 733	record[-]	none	2-OH-atorvastatin	Atorvastatin	551.623			statin[+]		record[-] / statin[+]	record[-] / statin[+]
Sample 734	record[+]	ATORVASTATIN	2-OH-atorvastatin	Atorvastatin	1041.68			statin[+]		record[+] / statin[+]	record[+] / statin[+]
Sample 735	record[-]	none						statin[-]			record[-] / statin[-]
Sample 736	record[-]	none						statin[-]			record[-] / statin[-]
Sample 737	record[+]	ATORVASTATIN	2-OH-atorvastatin	Atorvastatin	324.572			statin[+]		record[+] / statin[+]	record[+] / statin[+]
Sample 738	record[+]	SIMVASTATIN	Simvastatin Acid	Simvastatin	5.50551			statin[+]		record[+] / statin[+]	record[+] / statin[+]
Sample 739	record[-]	none						statin[-]			record[-] / statin[-]
Sample 740	record[-]	none						statin[-]			record[-] / statin[-]
Sample 741	record[+]	ROSUVASTATIN	Rosuvastatin	Rosuvastatin	15.6992			statin[+]		record[+] / statin[+]	record[+] / statin[+]
Sample 742	record[-]	none						statin[-]			record[-] / statin[-]
Sample 743	record[-]	none	Rosuvastatin	Rosuvastatin	11.1724			statin[+]		record[-] / statin[+]	record[-] / statin[+]
Sample 744	record[+]	SIMVASTATIN	Simvastatin Acid	Simvastatin	6.38335			statin[+]		record[+] / statin[+]	record[+] / statin[+]
Sample 745	record[-]	none						statin[-]			record[-] / statin[-]
Sample 746	record[+]	ATORVASTATIN	Atorvastatin	Atorvastatin	466.72			statin[+]		record[+] / statin[+]	record[+] / statin[+]
Sample 747	record[-]	none	2-OH-atorvastatin	Atorvastatin	845.415			statin[+]		record[-] / statin[+]	record[-] / statin[+]
Sample 748	record[+]	SIMVASTATIN	Simvastatin Acid	Simvastatin	7.88976			statin[+]		record[+] / statin[+]	record[+] / statin[+]
Sample 749	record[-]	none	2-OH-atorvastatin	Atorvastatin	119.763	Fenofibric acid	65.961	statin[+]		record[-] / statin[+]	record[-] / statin[+]
Sample 750	record[-]	none	2-OH-atorvastatin	Atorvastatin	501.092			statin[+]		record[-] / statin[+]	record[-] / statin[+]
Sample 751	record[-]	none						statin[-]			record[-] / statin[-]
Sample 752	record[+]	ATORVASTATIN	2-OH-atorvastatin	Atorvastatin	265.622			statin[+]		record[+] / statin[+]	record[+] / statin[+]
Sample 753	record[+]	ATORVASTATIN	2-OH-atorvastatin	Atorvastatin	311.555			statin[+]		record[+] / statin[+]	record[+] / statin[+]
Sample 754	record[-]	none	2-OH-atorvastatin	Atorvastatin	22.9916			statin[+]		record[-] / statin[+]	record[-] / statin[+]
Sample 755	record[+]	SIMVASTATIN	Simvastatin Acid	Simvastatin	25.4633			statin[+]		record[+] / statin[+]	record[+] / statin[+]
Sample 756	record[-]	none				Fenofibric acid	63.9541	statin[-]			record[-] / statin[-]
Sample 757	record[-]	none						statin[-]			record[-] / statin[-]
Sample 758	record[-]	none						statin[-]			record[-] / statin[-]
Sample 759	record[-]	none	2-OH-atorvastatin	Atorvastatin	107.478			statin[+]		record[-] / statin[+]	record[-] / statin[+]
Sample 760	record[-]	none	Atorvastatin	Atorvastatin	439.371			statin[+]		record[-] / statin[+]	record[-] / statin[+]
Sample 761	record[+]	ATORVASTATIN				Fenofibric acid	3187.1	statin[-]			record[+] / statin[-]
Sample 762	record[-]	none	Atorvastatin	Atorvastatin	24.7283			statin[+]		record[-] / statin[+]	record[-] / statin[+]
Sample 763	record[-]	none						statin[-]			record[-] / statin[-]
Sample 764	record[-]	none						statin[-]			record[-] / statin[-]
Sample 765	record[-]	none	Pravastatin	Pravastatin	60.3338	Fenofibric acid	99088.1	statin[+]		record[-] / statin[+]	record[-] / statin[+]
Sample 766	record[+]	SIMVASTATIN	Simvastatin Acid	Simvastatin	245.323			statin[+]		record[+] / statin[+]	record[+] / statin[+]
Sample 767	record[-]	none	Simvastatin Acid	Simvastatin	14.8772	Fenofibric acid	280.867	statin[+]		record[-] / statin[+]	record[-] / statin[+]
Sample 768	record[-]	none						statin[-]			record[-] / statin[-]
Sample 769	record[-]	none	Simvastatin Acid	Simvastatin	7.20884			statin[+]		record[-] / statin[+]	record[-] / statin[+]
Sample 770	record[-]	none						statin[-]			record[-] / statin[-]
Sample 771	record[+]	SIMVASTATIN						statin[-]			record[+] / statin[-]
Sample 772	record[-]	none	2-OH-atorvastatin	Atorvastatin	75.0833			statin[+]		record[-] / statin[+]	record[-] / statin[+]
Sample 773	record[-]	none						statin[-]			record[-] / statin[-]
Sample 774	record[-]	none	Simvastatin Acid	Simvastatin	11.586			statin[+]		record[-] / statin[+]	record[-] / statin[+]
Sample 775	record[-]	none				Gemfibrozil	269.068	statin[+]	fibrate[+]	record[-] / statin[+]	record[-] / statin[+] / fibrate[+]
Sample 776	record[+]	SIMVASTATIN	Simvastatin Acid	Simvastatin	10.2191			statin[+]		record[+] / statin[+]	record[+] / statin[+]
Sample 777	record[+]	ATORVASTATIN	Atorvastatin	Atorvastatin	398.372			statin[+]		record[+] / statin[+]	record[+] / statin[+]
Sample 778	record[+]	SIMVASTATIN	Simvastatin Acid	Simvastatin	30.8535			statin[+]		record[+] / statin[+]	record[+] / statin[+]
Sample 779	record[-]	none						statin[-]			record[-] / statin[-]
Sample 780	record[-]	none						statin[-]			record[-] / statin[-]
Sample 781	record[+]	SIMVASTATIN	Simvastatin Acid	Simvastatin	9.26794			statin[+]		record[+] / statin[+]	record[+] / statin[+]
Sample 782	record[-]	none	2-OH-atorvastatin	Atorvastatin	195.722			statin[+]		record[-] / statin[+]	record[-] / statin[+]
Sample 783	record[-]	none						statin[-]			record[-] / statin[-]
Sample 784	record[+]	ATORVASTATIN	2-OH-atorvastatin	Atorvastatin	312.508			statin[+]		record[+] / statin[+]	record[+] / statin[+]
Sample 785	record[+]	PRAVASTATIN	Pravastatin	Pravastatin	11.0255			statin[+]		record[+] / statin[+]	record[+] / statin[+]
Sample 786	record[-]	none				Fenofibric acid	151.5	statin[-]			record[-] / statin[-]
Sample 787	record[+]	ATORVASTATIN	2-OH-atorvastatin	Atorvastatin	86.128			statin[+]		record[+] / statin[+]	record[+] / statin[+]
Sample 788	record[+]	ROSUVASTATIN	Rosuvastatin	Rosuvastatin	43.3788			statin[+]		record[+] / statin[+]	record[+] / statin[+]
Sample 789	record[-]	none	Fluvastatin	Fluvastatin	19.3373			statin[+]		record[-] / statin[+]	record[-] / statin[+]
Sample 790	record[+]	PRAVASTATIN	Pravastatin	Pravastatin	7.48857			statin[+]		record[+] / statin[+]	record[+] / statin[+]
Sample 791	record[+]	PRAVASTATIN	Pravastatin	Pravastatin	13.528			statin[+]		record[+] / statin[+]	record[+] / statin[+]
Sample 792	record[-]	none						statin[-]			record[-] / statin[-]
Sample 793	record[-]	none	Atorvastatin	Atorvastatin	889.219			statin[+]		record[-] / statin[+]	record[-] / statin[+]
Sample 794	record[+]	ATORVASTATIN	2-OH-atorvastatin	Atorvastatin	944.594			statin[+]		record[+] / statin[+]	record[+] / statin[+]
Sample 795	record[-]	none	Lovastatin acid	Lovastatin acid	27.1775			statin[+]		record[-] / statin[+]	record[-] / statin[+]
Sample 796	record[-]	none	2-OH-atorvastatin	Atorvastatin	275.37			statin[+]		record[-] / statin[+]	record[-] / statin[+]
Sample 797	record[-]	none	2-OH-atorvastatin	Atorvastatin	51.1135			statin[+]		record[-] / statin[+]	record[-] / statin[+]
Sample 798	record[+]	ROSUVASTATIN	Rosuvastatin	Rosuvastatin	9.86662			statin[+]		record[+] / statin[+]	record[+] / statin[+]
Sample 799	record[+]	ATORVASTATIN	2-OH-atorvastatin	Atorvastatin	521.07			statin[+]		record[+] / statin[+]	record[+] / statin[+]
Sample 800	record[-]	none						statin[-]			record[-] / statin[-]
Sample 801	record[-]	none	2-OH-atorvastatin	Atorvastatin	153.515			statin[+]		record[-] / statin[+]	record[-] / statin[+]
Sample 802	record[-]	none	2-OH-atorvastatin	Atorvastatin	225.307	Fenofibric acid	120.388	statin[+]		record[-] / statin[+]	record[-] / statin[+]
Sample 803	record[+]	SIMVASTATIN	Simvastatin Acid	Simvastatin	23.7476			statin[+]		record[+] / statin[+]	record[+] / statin[+]
Sample 804	record[+]	SIMVASTATIN	Simvastatin Acid	Simvastatin	85.0923			statin[+]		record[+] / statin[+]	record[+] / statin[+]
Sample 805	record[+]	ATORVASTATIN	2-OH-atorvastatin	Atorvastatin	615.336			statin[+]		record[+] / statin[+]	record[+] / statin[+]
Sample 806	record[-]	none	2-OH-atorvastatin	Atorvastatin	1456.74			statin[+]		record[-] / statin[+]	record[-] / statin[+]
Sample 807	record[-]	none	2-OH-atorvastatin	Atorvastatin	2440.41			statin[+]		record[-] / statin[+]	record[-] / statin[+]
Sample 808	record[-]	none	2-OH-atorvastatin	Atorvastatin	129.543	Fenofibric acid	10426.2	statin[+]		record[-] / statin[+]	record[-] / statin[+]
Sample 809	record[+]	ATORVASTATIN	2-OH-atorvastatin	Atorvastatin	69.2541			statin[+]		record[+] / statin[+]	record[+] / statin[+]
Sample 810	record[+]	SIMVASTATIN						statin[-]			record[+] / statin[-]
Sample 811	record[+]	SIMVASTATIN	2-OH-atorvastatin	Atorvastatin	485.55	Fenofibric acid	310.421	statin[+]		record[+] / statin[+]	record[+] / statin[+]
Sample 812	record[-]	none						statin[-]			record[-] / statin[-]
Sample 813	record[-]	none						statin[-]			record[-] / statin[-]
Sample 814	record[+]	ATORVASTATIN	2-OH-atorvastatin	Atorvastatin	110.181			statin[+]		record[+] / statin[+]	record[+] / statin[+]
Sample 815	record[-]	none	Atorvastatin	Atorvastatin	865.898			statin[+]		record[-] / statin[+]	record[-] / statin[+]
Sample 816	record[+]	ATORVASTATIN	2-OH-atorvastatin	Atorvastatin	549.586			statin[+]		record[+] / statin[+]	record[+] / statin[+]
Sample 817	record[-]	none	Simvastatin Acid	Simvastatin	3.35271			statin[+]		record[-] / statin[+]	record[-] / statin[+]
Sample 818	record[+]	SIMVASTATIN	Simvastatin Acid	Simvastatin	3.47974			statin[+]		record[+] / statin[+]	record[+] / statin[+]
Sample 819	record[+]	ATORVASTATIN	Atorvastatin	Atorvastatin	2597.47			statin[+]		record[+] / statin[+]	record[+] / statin[+]
Sample 820	record[-]	none	Rosuvastatin	Rosuvastatin	17.5048			statin[+]		record[-] / statin[+]	record[-] / statin[+]
Sample 821	record[-]	none	2-OH-atorvastatin	Atorvastatin	164.25			statin[+]		record[-] / statin[+]	record[-] / statin[+]
Sample 822	record[-]	none	2-OH-atorvastatin	Atorvastatin	4334.62			statin[+]		record[-] / statin[+]	record[-] / statin[+]
Sample 823	record[+]	SIMVASTATIN	Simvastatin Acid	Simvastatin	12.3726			statin[+]		record[+] / statin[+]	record[+] / statin[+]
Sample 824	record[-]	none				Gemfibrozil	295.744	statin[+]	fibrate[+]	record[-] / statin[+]	record[-] / statin[+] / fibrate[+]
Sample 825	record[+]	SIMVASTATIN	2-OH-atorvastatin	Atorvastatin	771.106			statin[+]		record[+] / statin[+]	record[+] / statin[+]
Sample 826	record[-]	none						statin[-]			record[-] / statin[-]
Sample 827	record[-]	none	2-OH-atorvastatin	Atorvastatin	190.67			statin[+]		record[-] / statin[+]	record[-] / statin[+]
Sample 828	record[+]	ROSUVASTATIN						statin[-]			record[+] / statin[-]
Sample 829	record[-]	none						statin[-]			record[-] / statin[-]
Sample 830	record[-]	none	2-OH-atorvastatin	Atorvastatin	261.675			statin[+]		record[-] / statin[+]	record[-] / statin[+]
Sample 831	record[-]	none						statin[-]			record[-] / statin[-]
Sample 832	record[-]	none	Simvastatin Acid	Simvastatin	2.76504			statin[+]		record[-] / statin[+]	record[-] / statin[+]
Sample 833	record[-]	none	2-OH-atorvastatin	Atorvastatin	1428.34			statin[+]		record[-] / statin[+]	record[-] / statin[+]
Sample 834	record[-]	none						statin[-]			record[-] / statin[-]
Sample 835	record[+]	SIMVASTATIN	Simvastatin Acid	Simvastatin	10.8735			statin[+]		record[+] / statin[+]	record[+] / statin[+]
Sample 836	record[-]	none						statin[-]			record[-] / statin[-]
Sample 837	record[-]	none						statin[-]			record[-] / statin[-]
Sample 838	record[-]	none						statin[-]			record[-] / statin[-]
Sample 839	record[-]	none				Fenofibric acid	66631.5	statin[-]			record[-] / statin[-]
Sample 840	record[+]	ATORVASTATIN	2-OH-atorvastatin	Atorvastatin	30.0779	Fenofibric acid	13.739	statin[+]		record[+] / statin[+]	record[+] / statin[+]
Sample 841	record[+]	ATORVASTATIN	Simvastatin Acid	Simvastatin	2.79441			statin[+]		record[+] / statin[+]	record[+] / statin[+]
Sample 842	record[-]	none	2-OH-atorvastatin	Atorvastatin	1025.27			statin[+]		record[-] / statin[+]	record[-] / statin[+]
Sample 843	record[+]	SIMVASTATIN	Simvastatin Acid	Simvastatin	22.4566			statin[+]		record[+] / statin[+]	record[+] / statin[+]
Sample 844	record[-]	none	Simvastatin Acid	Simvastatin	2.42104			statin[+]		record[-] / statin[+]	record[-] / statin[+]
Sample 845	record[+]	SIMVASTATIN	Simvastatin Acid	Simvastatin	29.9366			statin[+]		record[+] / statin[+]	record[+] / statin[+]
Sample 846	record[-]	none	2-OH-atorvastatin	Atorvastatin	464.154			statin[+]		record[-] / statin[+]	record[-] / statin[+]
Sample 847	record[-]	none						statin[-]			record[-] / statin[-]
Sample 848	record[-]	none						statin[-]			record[-] / statin[-]
Sample 849	record[-]	none	Atorvastatin	Atorvastatin	7.87907			statin[+]		record[-] / statin[+]	record[-] / statin[+]
Sample 850	record[-]	none	Simvastatin Acid	Simvastatin	6.68051			statin[+]		record[-] / statin[+]	record[-] / statin[+]
Sample 851	record[-]	none	2-OH-atorvastatin	Atorvastatin	99.3341			statin[+]		record[-] / statin[+]	record[-] / statin[+]
Sample 852	record[-]	none						statin[-]			record[-] / statin[-]
Sample 853	record[-]	none						statin[-]			record[-] / statin[-]
Sample 854	record[+]	SIMVASTATIN						statin[-]			record[+] / statin[-]
Sample 855	record[+]	SIMVASTATIN						statin[-]			record[+] / statin[-]
Sample 856	record[+]	ATORVASTATIN	2-OH-atorvastatin	Atorvastatin	452.248			statin[+]		record[+] / statin[+]	record[+] / statin[+]
Sample 857	record[-]	none	Lovastatin acid	Lovastatin acid	4.03338			statin[+]		record[-] / statin[+]	record[-] / statin[+]
Sample 858	record[-]	none						statin[-]			record[-] / statin[-]
Sample 859	record[+]	ATORVASTATIN	2-OH-atorvastatin	Atorvastatin	130.418			statin[+]		record[+] / statin[+]	record[+] / statin[+]
Sample 860	record[-]	none	Simvastatin Acid	Simvastatin	5.53522			statin[+]		record[-] / statin[+]	record[-] / statin[+]
Sample 861	record[-]	none						statin[-]			record[-] / statin[-]
Sample 862	record[+]	SIMVASTATIN						statin[-]			record[+] / statin[-]
Sample 863	record[-]	none	2-OH-atorvastatin	Atorvastatin	38.036			statin[+]		record[-] / statin[+]	record[-] / statin[+]
Sample 864	record[-]	none				Fenofibric acid	42457.5	statin[-]			record[-] / statin[-]
Sample 865	record[-]	none	Rosuvastatin	Rosuvastatin	3.38572			statin[+]		record[-] / statin[+]	record[-] / statin[+]
Sample 866	record[-]	none	2-OH-atorvastatin	Atorvastatin	7.1118			statin[+]		record[-] / statin[+]	record[-] / statin[+]
Sample 867	record[+]	ATORVASTATIN	2-OH-atorvastatin	Atorvastatin	467.422			statin[+]		record[+] / statin[+]	record[+] / statin[+]
Sample 868	record[-]	none	2-OH-atorvastatin	Atorvastatin	333.943			statin[+]		record[-] / statin[+]	record[-] / statin[+]
Sample 869	record[+]	ATORVASTATIN	2-OH-atorvastatin	Atorvastatin	93.263			statin[+]		record[+] / statin[+]	record[+] / statin[+]
Sample 870	record[+]	ATORVASTATIN	Atorvastatin	Atorvastatin	555.788			statin[+]		record[+] / statin[+]	record[+] / statin[+]
Sample 871	record[+]	SIMVASTATIN	Atorvastatin	Atorvastatin	230.853			statin[+]		record[+] / statin[+]	record[+] / statin[+]
Sample 872	record[+]	ATORVASTATIN	2-OH-atorvastatin	Atorvastatin	478.407			statin[+]		record[+] / statin[+]	record[+] / statin[+]
Sample 873	record[+]	ATORVASTATIN	2-OH-atorvastatin	Atorvastatin	83.4188			statin[+]		record[+] / statin[+]	record[+] / statin[+]
Sample 874	record[+]	ATORVASTATIN	2-OH-atorvastatin	Atorvastatin	61.3216			statin[+]		record[+] / statin[+]	record[+] / statin[+]
Sample 875	record[+]	ATORVASTATIN	2-OH-atorvastatin	Atorvastatin	9.08687			statin[+]		record[+] / statin[+]	record[+] / statin[+]
Sample 876	record[+]	SIMVASTATIN						statin[-]			record[+] / statin[-]
Sample 877	record[+]	SIMVASTATIN	Fluvastatin	Fluvastatin	4.30798			statin[+]		record[+] / statin[+]	record[+] / statin[+]
Sample 878	record[-]	none	Simvastatin Acid	Simvastatin	3.27114			statin[+]		record[-] / statin[+]	record[-] / statin[+]
Sample 879	record[-]	none						statin[-]			record[-] / statin[-]
Sample 880	record[+]	ATORVASTATIN				Gemfibrozil	68.0414	statin[+]	fibrate[+]	record[+] / statin[+]	record[+] / statin[+] / fibrate[+]
Sample 881	record[-]	none						statin[-]			record[-] / statin[-]
Sample 882	record[+]	ATORVASTATIN	2-OH-atorvastatin	Atorvastatin	219.163			statin[+]		record[+] / statin[+]	record[+] / statin[+]
Sample 883	record[+]	ATORVASTATIN	2-OH-atorvastatin	Atorvastatin	26.8885			statin[+]		record[+] / statin[+]	record[+] / statin[+]
Sample 884	record[-]	none						statin[-]			record[-] / statin[-]
Sample 885	record[-]	none	Atorvastatin	Atorvastatin	623.325			statin[+]		record[-] / statin[+]	record[-] / statin[+]
Sample 886	record[-]	none						statin[-]			record[-] / statin[-]
Sample 887	record[+]	SIMVASTATIN	2-OH-atorvastatin	Atorvastatin	616.157	Fenofibric acid	2170.34	statin[+]		record[+] / statin[+]	record[+] / statin[+]
Sample 888	record[+]	ATORVASTATIN	Atorvastatin	Atorvastatin	344.103	Fenofibric acid	19.1553	statin[+]		record[+] / statin[+]	record[+] / statin[+]
Sample 889	record[+]	ATORVASTATIN	2-OH-atorvastatin	Atorvastatin	877.296			statin[+]		record[+] / statin[+]	record[+] / statin[+]
Sample 890	record[-]	none	Atorvastatin	Atorvastatin	3597.49			statin[+]		record[-] / statin[+]	record[-] / statin[+]
Sample 891	record[+]	ATORVASTATIN	2-OH-atorvastatin	Atorvastatin	136.095			statin[+]		record[+] / statin[+]	record[+] / statin[+]
Sample 892	record[-]	none						statin[-]			record[-] / statin[-]
Sample 893	record[-]	none	2-OH-atorvastatin	Atorvastatin	372.352			statin[+]		record[-] / statin[+]	record[-] / statin[+]
Sample 894	record[+]	ATORVASTATIN	2-OH-atorvastatin	Atorvastatin	1001.29			statin[+]		record[+] / statin[+]	record[+] / statin[+]
Sample 895	record[+]	ROSUVASTATIN	Simvastatin Acid	Simvastatin	7.88911			statin[+]		record[+] / statin[+]	record[+] / statin[+]
Sample 896	record[-]	none						statin[-]			record[-] / statin[-]
Sample 897	record[+]	ATORVASTATIN	2-OH-atorvastatin	Atorvastatin	537.128			statin[+]		record[+] / statin[+]	record[+] / statin[+]
Sample 898	record[+]	SIMVASTATIN	Simvastatin Acid	Simvastatin	7.8939			statin[+]		record[+] / statin[+]	record[+] / statin[+]
Sample 899	record[+]	ATORVASTATIN	2-OH-atorvastatin	Atorvastatin	255.986			statin[+]		record[+] / statin[+]	record[+] / statin[+]
Sample 900	record[+]	PRAVASTATIN	Pravastatin	Pravastatin	9.67239			statin[+]		record[+] / statin[+]	record[+] / statin[+]
Sample 901	record[+]	SIMVASTATIN						statin[-]			record[+] / statin[-]
Sample 902	record[+]	ATORVASTATIN	2-OH-atorvastatin	Atorvastatin	368.403			statin[+]		record[+] / statin[+]	record[+] / statin[+]
Sample 903	record[+]	SIMVASTATIN/EZE	2-OH-atorvastatin	Atorvastatin	7410.03			statin[+]		record[+] / statin[+]	record[+] / statin[+]
Sample 904	record[-]	none				Gemfibrozil	31.3622	statin[+]	fibrate[+]	record[-] / statin[+]	record[-] / statin[+] / fibrate[+]
Sample 905	record[+]	ATORVASTATIN	2-OH-atorvastatin	Atorvastatin	54.2696			statin[+]		record[+] / statin[+]	record[+] / statin[+]
Sample 906	record[+]	ATORVASTATIN	2-OH-atorvastatin	Atorvastatin	1005.93			statin[+]		record[+] / statin[+]	record[+] / statin[+]
Sample 907	record[+]	ATORVASTATIN	2-OH-atorvastatin	Atorvastatin	23.1251			statin[+]		record[+] / statin[+]	record[+] / statin[+]
Sample 908	record[+]	ATORVASTATIN	2-OH-atorvastatin	Atorvastatin	294.119			statin[+]		record[+] / statin[+]	record[+] / statin[+]
Sample 909	record[+]	ATORVASTATIN	2-OH-atorvastatin	Atorvastatin	2.46868			statin[+]		record[+] / statin[+]	record[+] / statin[+]
Sample 910	record[-]	none	2-OH-atorvastatin	Atorvastatin	28.8878			statin[+]		record[-] / statin[+]	record[-] / statin[+]
Sample 911	record[+]	SIMVASTATIN	Simvastatin Acid	Simvastatin	17.4585			statin[+]		record[+] / statin[+]	record[+] / statin[+]
Sample 912	record[+]	SIMVASTATIN	Simvastatin Acid	Simvastatin	3.31475			statin[+]		record[+] / statin[+]	record[+] / statin[+]
Sample 913	record[-]	none						statin[-]			record[-] / statin[-]
Sample 914	record[-]	none	2-OH-atorvastatin	Atorvastatin	149.315			statin[+]		record[-] / statin[+]	record[-] / statin[+]
Sample 915	record[-]	none	Rosuvastatin	Rosuvastatin	18.9535			statin[+]		record[-] / statin[+]	record[-] / statin[+]
Sample 916	record[-]	none						statin[-]			record[-] / statin[-]
Sample 917	record[+]	PRAVASTATIN	Pravastatin	Pravastatin	6.37891			statin[+]		record[+] / statin[+]	record[+] / statin[+]
Sample 918	record[-]	none	2-OH-atorvastatin	Atorvastatin	34.9901			statin[+]		record[-] / statin[+]	record[-] / statin[+]
Sample 919	record[-]	none	Atorvastatin	Atorvastatin	2491.6			statin[+]		record[-] / statin[+]	record[-] / statin[+]
Sample 920	record[+]	ATORVASTATIN	2-OH-atorvastatin	Atorvastatin	21.3832			statin[+]		record[+] / statin[+]	record[+] / statin[+]
Sample 921	record[-]	none						statin[-]			record[-] / statin[-]
Sample 922	record[+]	ATORVASTATIN				Gemfibrozil	6699.53	statin[+]	fibrate[+]	record[+] / statin[+]	record[+] / statin[+] / fibrate[+]
Sample 923	record[-]	none						statin[-]			record[-] / statin[-]
Sample 924	record[+]	ATORVASTATIN	2-OH-atorvastatin	Atorvastatin	86.5825			statin[+]		record[+] / statin[+]	record[+] / statin[+]
Sample 925	record[+]	SIMVASTATIN	Simvastatin Acid	Simvastatin	4.926			statin[+]		record[+] / statin[+]	record[+] / statin[+]
Sample 926	record[-]	none						statin[-]			record[-] / statin[-]
Sample 927	record[+]	ATORVASTATIN	2-OH-atorvastatin	Atorvastatin	103.504			statin[+]		record[+] / statin[+]	record[+] / statin[+]
Sample 928	record[+]	ATORVASTATIN	2-OH-atorvastatin	Atorvastatin	89.3324	Fenofibric acid	43.1416	statin[+]		record[+] / statin[+]	record[+] / statin[+]
Sample 929	record[+]	ATORVASTATIN	2-OH-atorvastatin	Atorvastatin	50.3819			statin[+]		record[+] / statin[+]	record[+] / statin[+]
Sample 930	record[+]	SIMVASTATIN	Simvastatin Acid	Simvastatin	8.49342			statin[+]		record[+] / statin[+]	record[+] / statin[+]
Sample 931	record[+]	SIMVASTATIN	Simvastatin Acid	Simvastatin	6.62882			statin[+]		record[+] / statin[+]	record[+] / statin[+]
Sample 932	record[-]	none						statin[-]			record[-] / statin[-]
Sample 933	record[-]	none						statin[-]			record[-] / statin[-]
Sample 934	record[+]	SIMVASTATIN	Simvastatin Acid	Simvastatin	4.20679			statin[+]		record[+] / statin[+]	record[+] / statin[+]
Sample 935	record[-]	none						statin[-]			record[-] / statin[-]
Sample 936	record[+]	LOVASTATIN	Lovastatin acid	Lovastatin acid	3.1307			statin[+]		record[+] / statin[+]	record[+] / statin[+]
Sample 937	record[+]	SIMVASTATIN	Simvastatin Acid	Simvastatin	2.72916			statin[+]		record[+] / statin[+]	record[+] / statin[+]
Sample 938	record[-]	none	Lovastatin acid	Lovastatin acid	7.73908			statin[+]		record[-] / statin[+]	record[-] / statin[+]
Sample 939	record[+]	SIMVASTATIN	Simvastatin Acid	Simvastatin	2.90533			statin[+]		record[+] / statin[+]	record[+] / statin[+]
Sample 940	record[-]	none						statin[-]			record[-] / statin[-]
Sample 941	record[-]	none						statin[-]			record[-] / statin[-]
